# Supplementary material for: Chromosome-level genome assembly of Plazaster borealis sheds light on the morphogenesis of multiarmed starfish and its regenerative capacity
Source: PubMed Central journal article supplement (PMC9270726; doi:10.1093/gigascience/giac063), 2022-07-09
Supplement: giac063_giga-d-21-00378_revision_1.pdf [file giac063_giga-d-21-00378_revision_1.pdf]

# GigaScience

## Chromosome-level genome assembly of *Plazaster borealis*: shed light on the morphogenesis of multi-armed starfish and its regenerative capacity --Manuscript Draft--

|                                                      |                                                                                                                                                                                                                                                                                                                                                                                                                                                                                                                                                                                                                                                                                                                                                                                                                                                                                                                                                                                                                                                                                                                                                                                                                                                                                    |                 |
|------------------------------------------------------|------------------------------------------------------------------------------------------------------------------------------------------------------------------------------------------------------------------------------------------------------------------------------------------------------------------------------------------------------------------------------------------------------------------------------------------------------------------------------------------------------------------------------------------------------------------------------------------------------------------------------------------------------------------------------------------------------------------------------------------------------------------------------------------------------------------------------------------------------------------------------------------------------------------------------------------------------------------------------------------------------------------------------------------------------------------------------------------------------------------------------------------------------------------------------------------------------------------------------------------------------------------------------------|-----------------|
| <b>Manuscript Number:</b>                            | GIGA-D-21-00378R1                                                                                                                                                                                                                                                                                                                                                                                                                                                                                                                                                                                                                                                                                                                                                                                                                                                                                                                                                                                                                                                                                                                                                                                                                                                                  |                 |
| <b>Full Title:</b>                                   | Chromosome-level genome assembly of <i>Plazaster borealis</i> : shed light on the morphogenesis of multi-armed starfish and its regenerative capacity                                                                                                                                                                                                                                                                                                                                                                                                                                                                                                                                                                                                                                                                                                                                                                                                                                                                                                                                                                                                                                                                                                                              |                 |
| <b>Article Type:</b>                                 | Data Note                                                                                                                                                                                                                                                                                                                                                                                                                                                                                                                                                                                                                                                                                                                                                                                                                                                                                                                                                                                                                                                                                                                                                                                                                                                                          |                 |
| <b>Funding Information:</b>                          | National Institute of Biological Resources (NIBR201930201)                                                                                                                                                                                                                                                                                                                                                                                                                                                                                                                                                                                                                                                                                                                                                                                                                                                                                                                                                                                                                                                                                                                                                                                                                         | PhD Jaewoong Yu |
| <b>Abstract:</b>                                     | <p><b>Background:</b> <i>Plazaster borealis</i> has a unique morphology displaying multiple arms with a clear distinction between disk and arms, rather than remarkable characteristic of Echinoderms. Herein we report the first chromosome-level reference genome of <i>P. borealis</i> and an essential tool to further investigate the basis of the divergent morphology.</p> <p><b>Findings:</b> Total 57.76 Gb of a long read and 70.83 Gb of short-read data were generated to assemble de novo 561Mb reference genome of <i>P. borealis</i>, and Hi-C sequencing data (57.47 Gb) was used for scaffolding into 22 chromosomal scaffolds comprising 92.38% of the genome. The genome completeness estimated by BUSCO is of 98.0% using the metazoan set, indicating a high-quality assembly. Through the comparative genome analysis, we identified evolutionary accelerated genes known to be involved in morphogenesis and regeneration, suggesting their potential role in shaping body pattern and capacity of regeneration.</p> <p><b>Conclusion:</b> This first chromosome-level genome assembly of <i>P. borealis</i> provides fundamental insights into echinoderm biology, as well as the genomic mechanism underlying its unique morphology and regeneration.</p> |                 |
| <b>Corresponding Author:</b>                         | Jaewoong Yu<br>eGnome Inc<br>Seoul, KOREA, REPUBLIC OF                                                                                                                                                                                                                                                                                                                                                                                                                                                                                                                                                                                                                                                                                                                                                                                                                                                                                                                                                                                                                                                                                                                                                                                                                             |                 |
| <b>Corresponding Author Secondary Information:</b>   |                                                                                                                                                                                                                                                                                                                                                                                                                                                                                                                                                                                                                                                                                                                                                                                                                                                                                                                                                                                                                                                                                                                                                                                                                                                                                    |                 |
| <b>Corresponding Author's Institution:</b>           | eGnome Inc                                                                                                                                                                                                                                                                                                                                                                                                                                                                                                                                                                                                                                                                                                                                                                                                                                                                                                                                                                                                                                                                                                                                                                                                                                                                         |                 |
| <b>Corresponding Author's Secondary Institution:</b> |                                                                                                                                                                                                                                                                                                                                                                                                                                                                                                                                                                                                                                                                                                                                                                                                                                                                                                                                                                                                                                                                                                                                                                                                                                                                                    |                 |
| <b>First Author:</b>                                 | Yujung Lee                                                                                                                                                                                                                                                                                                                                                                                                                                                                                                                                                                                                                                                                                                                                                                                                                                                                                                                                                                                                                                                                                                                                                                                                                                                                         |                 |
| <b>First Author Secondary Information:</b>           |                                                                                                                                                                                                                                                                                                                                                                                                                                                                                                                                                                                                                                                                                                                                                                                                                                                                                                                                                                                                                                                                                                                                                                                                                                                                                    |                 |
| <b>Order of Authors:</b>                             | Yujung Lee<br>Bongsang Kim<br>Jaehoon Jung<br>Bomin Koh<br>So Yun Jhang<br>Chaeyoung Ban<br>Won-Jae Chi<br>Soonok Kim<br>Jaewoong Yu                                                                                                                                                                                                                                                                                                                                                                                                                                                                                                                                                                                                                                                                                                                                                                                                                                                                                                                                                                                                                                                                                                                                               |                 |
| <b>Order of Authors Secondary Information:</b>       |                                                                                                                                                                                                                                                                                                                                                                                                                                                                                                                                                                                                                                                                                                                                                                                                                                                                                                                                                                                                                                                                                                                                                                                                                                                                                    |                 |
| <b>Response to Reviewers:</b>                        | Reviewer #1:<br>1.Suggestions and editions of the language.                                                                                                                                                                                                                                                                                                                                                                                                                                                                                                                                                                                                                                                                                                                                                                                                                                                                                                                                                                                                                                                                                                                                                                                                                        |                 |

We revised all the suggested sentences in the manuscript.

2.How did you measure significance here: "The significantly expanded genes in the genome of *P. borealis* were significantly enriched in categories of Notch and BMP signaling pathway, body pattern specification, morphogenesis, and eye development ( $P < 0.02$ ) (Figure 4).

CAFE5 implements a birth-death model for evolutionary inferences about gene family evolution. Its main task is the maximum-likelihood estimation of a global or local gene family evolutionary rates for a given data set. From the output 'model\_branch\_probabilities.txt', we could get the probabilities calculated for each clade and significant family. The gene families satisfying cut off 0.05 were used as significantly expanded or reduced genes.

The 'P-value  $< 0.02$ ' used to get significantly enriched GO terms was determined to filter out comprehensive GO terms.

3.Did you do correction for multiple testing? both for the GO term analysis and the PAML analysis.

Yes. We described it in the manuscript line 372-379.

4.Which model of PAML was used? Model A? Please describe the null model and the one that allowed for positive selection.

We used branch site A model with null model (model = 2, NSsites =2, fix\_omega = 1, omega = 1) and alternative model (model = 2, NSsites =2, fix\_omega = 0). We supplemented the details in the manuscript. (line 365-368)

Reviewer #2:

1.Suggestions and editions of the language.

We revised all the suggested sentences in the manuscript.

2.Page 7: "Each gene sets consisted as following, S: 97.6%, 97.0%; D: 1.2%, 1.0%; F: 0.8%, 1.2%; and M: 0.4%, 0.8%. (S: single-copy, D: duplicated, F: fragmental, M: missed of eukaryotic\_odb10 and metabozan\_odb10 data set, respectively)"

>> This is awkwardly written. It would be best to write these out in sentences, but at the very least instead of providing a key just use the term. For example: "Each gene sets consisted as following: single-copy 97.6%..."

>> Also the second number is not explained. Is it needed? If so, explain it. Or just relegate the details to a supplemental table?

The second number was the BUSCO values based on the eukaryotic\_odb10 gene set. The value was added to emphasize the genome completeness but we agree that it is redundant value. So we revised the manuscript (line 94-97).

3.Page 8: "To understand the phylogenetic location of *P. borealis*, we used a BLAST-based hierarchical clustering algorithm for genome-wide phylogenetic analysis based on protein sequences from seven echinoderm genomes."

>> The phylogeny is not acceptable. There is no description of how orthologs were called, there is no details of the program used to generate alignment or phylogeny. Hierarchical clustering is not an acceptable phylogenetic method. I recommend using single-copy orthologs from OrthoFinder or Orthomcl, aligning them with MAFFT, and using a maximum-likelihood algorithm to generate the tree. IQTREE or RAxML with automatic model determination would work.

We used 'species tree' calculated from the OrthoFinder2 to show the phylogenetic relationship of *P. borealis* among the 6 echinoderm species. The OrthoFinder2 infers phylogenetic relationship of the species in a way that is not much different from your recommendation: 1) orthogroup inference, 2) inference of gene trees for each orthogroup, and 3) analysis of these gene trees to infer the rooted species tree. After identifying orthogroups, the OrthoFinder2 uses these orthogroups to infer gene

|                                                                                                                                                                                                                                                                                                        |                                                                                                                                                                                                                                                                                                                                                                                                                                                                                                                                                                                                                                                                                                                                                                                                                                                                                                                                                                                                                                                                                                                                                                                                                                                                                                                                                                                                                                                                                                                                                                                                                                                                                                                                                                                                                                                                                                                                                                                                                                                                                                                                                                                                                                                                                                                                                                                                                                                                                                                                                                                                                                                                                                                                                                                                                                                                                                                                                                                                                                                                                                    |
|--------------------------------------------------------------------------------------------------------------------------------------------------------------------------------------------------------------------------------------------------------------------------------------------------------|----------------------------------------------------------------------------------------------------------------------------------------------------------------------------------------------------------------------------------------------------------------------------------------------------------------------------------------------------------------------------------------------------------------------------------------------------------------------------------------------------------------------------------------------------------------------------------------------------------------------------------------------------------------------------------------------------------------------------------------------------------------------------------------------------------------------------------------------------------------------------------------------------------------------------------------------------------------------------------------------------------------------------------------------------------------------------------------------------------------------------------------------------------------------------------------------------------------------------------------------------------------------------------------------------------------------------------------------------------------------------------------------------------------------------------------------------------------------------------------------------------------------------------------------------------------------------------------------------------------------------------------------------------------------------------------------------------------------------------------------------------------------------------------------------------------------------------------------------------------------------------------------------------------------------------------------------------------------------------------------------------------------------------------------------------------------------------------------------------------------------------------------------------------------------------------------------------------------------------------------------------------------------------------------------------------------------------------------------------------------------------------------------------------------------------------------------------------------------------------------------------------------------------------------------------------------------------------------------------------------------------------------------------------------------------------------------------------------------------------------------------------------------------------------------------------------------------------------------------------------------------------------------------------------------------------------------------------------------------------------------------------------------------------------------------------------------------------------------|
|                                                                                                                                                                                                                                                                                                        | <p>trees for all orthogroups. The inferred gene trees were analyzed to identify the species tree using STAG algorithm. STAG was developed to leverage the vast amount of phylogenetic information already available in the complete set of orthogroup gene trees inferred by OrthoFinder. It was also developed to be robust to high levels of gene duplication and loss that can hamper methods that rely on sets of single-copy orthologs. The method subsequently identifies all gene duplication events in the complete set of gene trees and analyzes this information in the context of the species tree.</p> <p>We revised ambiguous sentences about the phylogenetic relationship in the manuscript. (line 118-122, 358-359)</p> <p>4. Page 8: "Syntenic relationships analyzed by MCscan [12] also proved their relationship."<br/>     &gt;&gt; However, the synteny scores between <i>P. borealis</i> and <i>Pisaster ochraceus</i> show more conservation than between <i>P. borealis</i> and <i>A. rubens</i>, suggesting that the synteny scores do not support that relationship. It is problematic that <i>P. glacialis</i> and <i>P. ochraceus</i> are not included in the phylogeny but are included in the synteny. Adding both to the phylogeny would help with the interpretation of the result.</p> <p><i>M. glacialis</i> and <i>P. ochraceus</i> were not able to be included in the phylogeny due to the absence of protein sequence data. The synteny score estimated with Chromeister indicates the similarity between genomes. With 0 indicating the exact same sequences and 1 indicating absolutely no similarity.</p> <p>Among 6 echinoderm species analyzed in the phylogenetic tree, <i>A. rubens</i> showed the closest relationship with <i>P. borealis</i> and synteny analysis also supported this relationship. The syntenic relationship with other starfish in Forcipulatida order, <i>M. glacialis</i> and <i>P. ochraceus</i>, showed that Forcipulatida order tends to have considerably conserved genome. Furthermore, they revealed high quality of constructed genome of <i>P. borealis</i>. We revised related contents in the manuscript. (line 123-129)</p> <p>5. Page 8: " These results suggest that genomes within the Forcipulatida order are remarkably conserved in terms of synteny and chromosome, supporting the high quality of the assembled genome."<br/>     &gt;&gt; There were no comparisons reported of non forcipulatid genomes, so this statement is problematic.</p> <p>We checked the syntenic relationship of <i>P. borealis</i> and <i>A. planci</i> which is non-Forcipulatida order starfish. The chromosomes of two species were not matched. We stated it in the manuscript. (line 129-131)</p> <p>6. We indicated in the manuscript that the other supporting data could be available in the GigaScience Database. While submitting the manuscript, we uploaded all the protein, transcript, and annotation file on the GigaDB FTP. The DOI of the dataset will be given a DOI on acceptance for the publication.</p> |
| <b>Additional Information:</b>                                                                                                                                                                                                                                                                         |                                                                                                                                                                                                                                                                                                                                                                                                                                                                                                                                                                                                                                                                                                                                                                                                                                                                                                                                                                                                                                                                                                                                                                                                                                                                                                                                                                                                                                                                                                                                                                                                                                                                                                                                                                                                                                                                                                                                                                                                                                                                                                                                                                                                                                                                                                                                                                                                                                                                                                                                                                                                                                                                                                                                                                                                                                                                                                                                                                                                                                                                                                    |
| <b>Question</b>                                                                                                                                                                                                                                                                                        | <b>Response</b>                                                                                                                                                                                                                                                                                                                                                                                                                                                                                                                                                                                                                                                                                                                                                                                                                                                                                                                                                                                                                                                                                                                                                                                                                                                                                                                                                                                                                                                                                                                                                                                                                                                                                                                                                                                                                                                                                                                                                                                                                                                                                                                                                                                                                                                                                                                                                                                                                                                                                                                                                                                                                                                                                                                                                                                                                                                                                                                                                                                                                                                                                    |
| Are you submitting this manuscript to a special series or article collection?                                                                                                                                                                                                                          | No                                                                                                                                                                                                                                                                                                                                                                                                                                                                                                                                                                                                                                                                                                                                                                                                                                                                                                                                                                                                                                                                                                                                                                                                                                                                                                                                                                                                                                                                                                                                                                                                                                                                                                                                                                                                                                                                                                                                                                                                                                                                                                                                                                                                                                                                                                                                                                                                                                                                                                                                                                                                                                                                                                                                                                                                                                                                                                                                                                                                                                                                                                 |
| <b>Experimental design and statistics</b>                                                                                                                                                                                                                                                              | Yes                                                                                                                                                                                                                                                                                                                                                                                                                                                                                                                                                                                                                                                                                                                                                                                                                                                                                                                                                                                                                                                                                                                                                                                                                                                                                                                                                                                                                                                                                                                                                                                                                                                                                                                                                                                                                                                                                                                                                                                                                                                                                                                                                                                                                                                                                                                                                                                                                                                                                                                                                                                                                                                                                                                                                                                                                                                                                                                                                                                                                                                                                                |
| <p>Full details of the experimental design and statistical methods used should be given in the Methods section, as detailed in our <a href="#">Minimum Standards Reporting Checklist</a>. Information essential to interpreting the data presented should be made available in the figure legends.</p> |                                                                                                                                                                                                                                                                                                                                                                                                                                                                                                                                                                                                                                                                                                                                                                                                                                                                                                                                                                                                                                                                                                                                                                                                                                                                                                                                                                                                                                                                                                                                                                                                                                                                                                                                                                                                                                                                                                                                                                                                                                                                                                                                                                                                                                                                                                                                                                                                                                                                                                                                                                                                                                                                                                                                                                                                                                                                                                                                                                                                                                                                                                    |

|                                                                                                                                                                                                                                                                                                                                                                                                                                                                                                                                                         |            |
|---------------------------------------------------------------------------------------------------------------------------------------------------------------------------------------------------------------------------------------------------------------------------------------------------------------------------------------------------------------------------------------------------------------------------------------------------------------------------------------------------------------------------------------------------------|------------|
| <p>Have you included all the information requested in your manuscript?</p>                                                                                                                                                                                                                                                                                                                                                                                                                                                                              |            |
| <p><b>Resources</b></p> <p>A description of all resources used, including antibodies, cell lines, animals and software tools, with enough information to allow them to be uniquely identified, should be included in the Methods section. Authors are strongly encouraged to cite <a href="#">Research Resource Identifiers</a> (RRIDs) for antibodies, model organisms and tools, where possible.</p> <p>Have you included the information requested as detailed in our <a href="#">Minimum Standards Reporting Checklist</a>?</p>                     | <p>Yes</p> |
| <p><b>Availability of data and materials</b></p> <p>All datasets and code on which the conclusions of the paper rely must be either included in your submission or deposited in <a href="#">publicly available repositories</a> (where available and ethically appropriate), referencing such data using a unique identifier in the references and in the “Availability of Data and Materials” section of your manuscript.</p> <p>Have you have met the above requirement as detailed in our <a href="#">Minimum Standards Reporting Checklist</a>?</p> | <p>Yes</p> |

1 **Chromosome-level genome assembly of *Plazaster borealis* shed light on the morphogenesis**  
2 **of multi-armed starfish and its regenerative capacity**

3 Yujung Lee<sup>1</sup> [0000-0003-2279-3147]; Bongsang Kim<sup>1,2</sup> [0000-0001-7526-8421]; Jaehoon  
4 Jung<sup>1,2</sup> [0000-0003-2019-0895]; Bomin Koh<sup>1</sup> [0000-0001-6702-6449]; So Yun Jhang<sup>1,3</sup> [0000-  
5 0002-2152-3746]; Chaeyoung Ban<sup>1</sup> [0000-0003-4566-4313]; Won-Jae Chi<sup>4</sup> [0000-0003-2893-  
6 7930]; Soonok Kim<sup>4</sup> [0000-0003-1654-3643]; Jaewoong Yu<sup>1,\*</sup> [0000-0002-4120-8890];

7 <sup>1</sup>eGnome, Inc., 26 Beobwon-ro 9-gil, Sonpa-gu, Seoul 05836, Republic of Korea;

8 <sup>2</sup>Department of Agricultural and Life Sciences and Research Institute of Population Genomics,  
9 Seoul National University, Seoul, Republic of Korea;

10 <sup>3</sup>Interdisciplinary Program in Bioinformatics, Seoul National University, Seoul, 151-742,  
11 Republic of Korea;

12 <sup>4</sup>Microorganism Resources Division, National Institute of Biological Resources, Incheon  
13 22689, Republic of Korea;

14 \*Correspondence address: Jaewoong Yu, eGnome Inc., 26 Beobwon-ro 9-gil, Sonpa-gu, Seoul  
15 05836, Korea. Email: [jwyu@egnome.co.kr](mailto:jwyu@egnome.co.kr); Tel.: +82-070-4694-6355

16 **Email addresses/ ORCIDs**

17 Yujung Lee<sup>1</sup>: [lyjung711@gmail.com](mailto:lyjung711@gmail.com), [lyjung7@egnome.co.kr](mailto:lyjung7@egnome.co.kr) / 0000-0003-2279-3147

18 Bongsang Kim<sup>1,2</sup>: [babybird93@snu.ac.kr](mailto:babybird93@snu.ac.kr), [kimbongsang@egnome.co.kr](mailto:kimbongsang@egnome.co.kr) / 0000-0001-7526-8421

19 Jaehoon Jung<sup>1,2</sup>: [motto@snu.ac.kr](mailto:motto@snu.ac.kr), [motto@egnome.co.kr](mailto:motto@egnome.co.kr) / 0000-0003-2019-0895

20 Bomin Koh<sup>1</sup>: [chloekoh@egnome.co.kr](mailto:chloekoh@egnome.co.kr) / 0000-0001-6702-6449

21 So Yun Jhang<sup>1,3</sup>: [soyun4595@snu.ac.kr](mailto:soyun4595@snu.ac.kr), [soyun4595@egnome.co.kr](mailto:soyun4595@egnome.co.kr) / 0000-0002-2152-3746

22 Chaeyoung Ban<sup>1</sup>: [terryban@egnome.co.kr](mailto:terryban@egnome.co.kr) / 0000-0003-4566-4313

23 Won-Jae Chi<sup>3,4</sup>: [wjchi76@korea.kr](mailto:wjchi76@korea.kr) / 0000-0003-2893-7930

24 Soonok Kim<sup>4</sup>: [sokim90@korea.kr](mailto:sokim90@korea.kr) / 0000-0003-1654-3643

25 Jaewoong Yu<sup>1,\*</sup>: [jwyu@egnome.co.kr](mailto:jwyu@egnome.co.kr) / 0000-0002-4120-8890

26 **Abstract**

27 **Background:** *Plazaster borealis* has a unique morphology displaying multiple arms with a  
28 clear distinction between disk and arms, rather than remarkable characteristic of Echinoderms.  
29 Herein we report the first chromosome-level reference genome of *P. borealis* and an essential  
30 tool to further investigate the basis of the divergent morphology.

31 **Findings:** Total 57.76 Gb of a long read and 70.83 Gb of short-read data were generated to  
32 assemble *de novo* 561Mb reference genome of *P. borealis*, and Hi-C sequencing data (57.47  
33 Gb) was used for scaffolding into 22 chromosomal scaffolds comprising 92.38% of the genome.  
34 The genome completeness estimated by BUSCO is of 98.0% using the metazoan set, indicating  
35 a high-quality assembly. Through the comparative genome analysis, we identified evolutionary  
36 accelerated genes known to be involved in morphogenesis and regeneration, suggesting their  
37 potential role in shaping body pattern and capacity of regeneration.

38 **Conclusion:** This first chromosome-level genome assembly of *P. borealis* provides  
39 fundamental insights into echinoderm biology, as well as the genomic mechanism underlying  
40 its unique morphology and regeneration.

41

42 **Data Description**

43 **Context**

44 Echinoderms are marine animals characterized by the following three remarkable  
45 characteristics: 1) extensive regenerative abilities in both adult and larval forms [1, 2], 2) the  
46 water vascular system used for gas, nutrient and waste exchange [3], and 3) extraordinary  
47 morphological characteristics including pentaradial symmetry [4, 5].

48 Pentaradial symmetry has been observed in all extant classes of echinoderm. Echinoids (sea  
49 urchin) and holothurians (sea cucumber) always have five ambulacral grooves, and crinoids  
50 have many arms in multiples of five that branch out from the five primary brachia [4, 5]. Most  
51 species of asteroids and ophiuroids are five-armed, but many exceptions are scattered across  
52 the tree of Echinodermata. Extant asteroids are distinguished by 34 families, including 20  
53 families of only five-armed species, nine families of both five-armed and multi-armed species,  
54 and five families with exclusively multi-armed species [6]. However, most multi-armed forms  
55 have arm numbers that cannot be divided into five, raising questions about the arm  
56 development mechanisms that do not follow the pentaradial symmetry.

57 The octopus starfish, *Plazaster borealis*, is a starfish that inhabits the water that surround Korea  
58 and Japan [7, 8]. It belongs to the family *Labidiasteridae*, one of five exclusively multi-armed  
59 families [6]. Figure 1A illustrates a unique morphology of *P. borealis* that the number of arms  
60 is around 31~40, which is a large number among multi-armed starfishes, and it shows a clear  
61 differentiation between arms and central disks [9].

62 In the previous study of *P. borealis*, Matsuoka et al. investigated the molecular phylogenetic  
63 relationship of five species from the order Forcipulatida: *Asterias amurensis*, *Aphelasterias*  
64 *japonica*, *Distolasterias nipon*, *Coscinasterias acutispina*, and *Plazaster borealis* [10]. *P.*  
65 *borealis* was the most closely related with five armed *A. amurensis* and distantly related with  
66 multi-armed *C. acutispina*. The result suggested that the unique morphology of *P. borealis*  
67 might have descended from a five-armed starfish, which possibly resulted from accelerated  
68 sequence evolution. However, the absence of a reference genome has limited in-depth research.  
69 To understand the genetic basis of the specialized morphology of the starfish, we sequenced  
70 the genome of *P. borealis* and performed comparative genomic analyses with the high-quality  
71 of well-annotated genome sequences of six other echinoderms (*Asterias rubens*, *Acanthaster*

72 *planci*, *Patiria miniata*, *Lytechinus variegatus*, *Parastichopus parvimensis*, and  
73 *Strongylocentrotus purpuratus*).

74

## 75 **Chromosome-level genome assembly of the octopus starfish**

76 We estimated the genome size of *P. borealis* with GenomeScope to be ~497Mb (Supplementary  
77 Figure 1). A comprehensive sequencing data set was generated for the *P. borealis* genome  
78 assembly based on this estimation. From the Nanopore sequencing platform, a total of 57.76  
79 Gb long read was yielded with 116x coverage. Using the Illumina sequencing platform, 142x  
80 coverage of Illumina short paired-end read sequencing data and 115x coverage of Hi-C paired-  
81 end reads were generated (Supplementary Table 1). Moreover, we sequenced 25.63 Gb of RNA  
82 Illumina short paired-end reads and 7.28 Gb of RNA Nanopore long reads to construct  
83 transcriptome assembly utilized for annotation.

84 A draft genome assembly was generated, consisting of 179 contigs totaling 561Mb with an  
85 N50 of 11Mb (Supplementary Table 2). We then scaffolded the contigs using Hi-C data with  
86 3D-DNA to obtain chromosomal information [11]. The total size of the final assembly was  
87 561Mb comprising 22 chromosome-level scaffolds with a contig N50 of 24Mb. These 22  
88 chromosome-level scaffolds comprise 92.48% of the assembly, although the remaining 42 Mb  
89 were unanchored and required further investigation (Table 1, Supplementary Figure 2). This  
90 number is consistent with chromosome results of other species of the order Forcipulatida,  
91 supporting the accurate chromosome number acquired in the current study.

92

## 93 **Completeness of the assembled genome**

94 The genome completeness was evaluated using BUSCO [12] with the metazoan dataset called



95 ‘metazoan\_odb10’. As a result, total of 935 (98.0%) core metazoan genes were successfully  
96 detected in the genome, consisting of 97.0% single-copy, 1.0% duplicated, 1.2% fragmental,  
97 and 0.8% missing genes from the metazoan dataset. We also estimated the overall assembly  
98 quality by comparing the k-mer distribution of the assemblies and the Illumina short-read sets  
99 using Merqury [13]. The genome assembly of *P. borealis* showed high-quality values (QV >  
100 36) with an error rate of 0.00023 (Table 1). Additionally, the GC content of *P. borealis* was  
101 38.89%, which was very similar to that of *A. rubens* (38.76%) and *P. ochraceus* (39.01%), the  
102 species of the order Forcipulatida. The assessment results validated the high quality of our final  
103 genome assembly. To our knowledge, this is the first high-quality chromosome level genome  
104 assembly for *P. borealis* and the first reference genome of the family *Labidiasteridae*.

105

#### 106 **Annotation of repeats and genes**

107 Repetitive elements accounted for 51.05% of the whole genome assembly, and detailed  
108 percentages of the predominant repetitive element families are summarized in Table 2. We  
109 annotated a total of 26,836 genes onto the assembled regions. Compared with other starfish, *P.*  
110 *borealis* has a similar average exon length (213 bp) and exon number per gene (7.19), but it  
111 has a shorter intron length (1,261 bp) than *A. rubens* (eAstRub1.3). BUSCO benchmarking  
112 value of this gene set was summarized as 92.6% of complete genes, including 90% single-copy,  
113 2.6% duplicated, 4.6% fragmental, and 2.8% missing genes from the metazoan dataset.  
114 Following a standard functional annotation, we observed that 24,248 (96.13%) genes were  
115 successfully annotated with at least one related functional assignment (Table 3).

116

#### 117 **Phylogenetic and syntenic relationship**

118 To understand the phylogenetic placement of *P. borealis*, species tree was inferred from sets of  
119 multi-copy gene trees with STAG algorithm [74] based on protein sequences from seven  
120 echinoderm genomes: *Asterias rubens*, *Acanthaster planci*, *Patiria miniata*, *Lytechinus*  
121 *variegatus*, *Parastichopus parvimensis*, and *Strongylocentrotus purpuratus*. *P. borealis* was the  
122 most closely related to *A. rubens* (Figure 2), consistent with both previous results [10].

123 Syntenic relationships analyzed by MCscan [14] also proved their relationship. In the genome  
124 of *P. borealis* and *A. rubens*, every chromosome matched each other well enough to suggest  
125 that the entire chromosomes seem to be highly conserved, except an additional genomic region  
126 detected in chromosome 7 of *P. borealis* (Figure 3A, 3B). A similar tendency, using  
127 Chromeister [15], was observed with other species of the order Forcipulatida, *P. ochraceus* and  
128 *M. glacialis*. *P. borealis* exhibited more conservation of synteny with *P. ochraceus* than *A.*  
129 *rubens*, which seems to be influenced by the observed genomic region. We also analyzed  
130 synteny of *P. borealis* with *A. planci*, the starfish of a different order; however, chromosomes  
131 were not matched. These results suggest that genomes within the Forcipulatida order are  
132 remarkably conserved in terms of synteny, allowing us to confirm the high quality of our  
133 genome assembly.

134

### 135 **Gene family evolution in *P. borealis*\***

136 Based on the assumption that the unique morphology of *P. borealis* is explained by accelerated  
137 evolutionary rate [10], we performed comparative genomic analyses among seven echinoderm  
138 species. Although the genetic mechanism underlying the development of supernumerary arms  
139 of starfish is elusive, it is expected that genes associated with tissue morphogenesis are  
140 increased to produce excessive arms. To investigate the expanded gene families, we performed  
141 expansion and contraction analysis of gene families using CAFE5 [16]. Compared with six

142 echinoderm species, 286 gene families were expanded, whereas 2,072 gene families were  
143 contracted in *P. borealis* (Figure 2). The significantly expanded genes in the genome of *P.*  
144 *borealis* were significantly enriched in categories of Notch and BMP signaling pathway, body  
145 pattern specification, morphogenesis, and eye development (P-value<0.02) (Figure 4).  
146 Collectively, these expanded gene families are likely to play an enhanced role in forming  
147 supernumerary arms of *P. borealis*. It is generally accepted that Notch and BMP signaling are  
148 evolutionally conserved and play multiple roles during animal development, especially in  
149 regulating body patterns. The Notch signaling pathway is essential for cell proliferation, cell  
150 fate decisions, and induction of differentiation during embryonic and postnatal development  
151 [17-19]. Besides regulating cell-fate decisions at an individual cell level, a cell-to-cell signaling  
152 mechanism of Notch coordinates the spatiotemporal patterning in a tissue [20]. In *Drosophila*  
153 *melanogaster*, Notch functions as it is required to specify the fate of the cells that will  
154 eventually segment leg and develop leg joint [21, 22]. The mechanisms of BMP gradient  
155 formation have been studied in various animals. BMP2/4 signaling study of sea urchin showed  
156 that interaction between BMP2/4 and chordin formed the dorsal-ventral gradient and resulted  
157 in dorsal-ventral axis patterning [23]. Furthermore, as the physical characteristic of starfish,  
158 their eyes exist at the end of each arm denoting that the arm development is accompanied with  
159 the eye development. However, contracted gene families of *P. borealis* had no significantly  
160 enriched functions, except GTPase regulator activity (GO:0030695, P-value=0.005647). Gene  
161 repertoires of *P. borealis* showed differences in the contents of other species' expanded and  
162 contracted genes mainly enriched in terms related to the nerve development (Supplementary  
163 Table 3).

164 In addition, we identified 607 gene families unique in *P. borealis* consisting of 2,631 genes and  
165 111 one-to-one orthologous genes between *P. borealis* and six other species. The gene families  
166 unique in *P. borealis* are enriched for the following gene ontology (GO) terms: apoptotic cell

167 clearance, positive regulation of epithelial cell proliferation, vascular transport, and activation  
168 of JNKK activity (Supplementary Table 4). The enriched term, activation of JNKK activity, is  
169 involved in the JNK pathway, which promotes apoptosis by upregulating pro-apoptotic gene  
170 expression [24]. Typically, cell proliferation and death are important to achieve tissue formation,  
171 involving changes in cell number, size, shape, and position [25]. Based on these findings, the  
172 presence of additional genes of the Notch pathway, BMP pathway, and JNK pathway involved  
173 in body pattern specification, cell proliferation, and apoptosis could indicate enhanced tissue  
174 shaping to form many arms.

175 The signaling pathways detected through expanded gene families, especially the Notch and  
176 BMP pathways, also play several key conserved roles in the regeneration of many species. For  
177 example, in the study of brittle stars, the inhibition of Notch signaling hindered arm  
178 regeneration and downregulated genes related to ECM component, cell proliferation, apoptosis,  
179 and innate immunity, which are biological processes associated with regeneration [26]. In  
180 addition, previous studies of echinoderm gene expression and other animals showed that Notch  
181 and BMP signaling are the principal pathways for tissue regeneration [27, 28].

182 The studies of the metamorphosis of multi-armed starfishes led to the proposal of the ‘Five-  
183 Plus’ hypothesis [6, 29]. It states that five primary arms generated concurrently develop in a  
184 controlled unit and supernumerary arms are produced in the separate and independent pathways.  
185 Although these pathways are still uncertain, Hotchkiss suggested two possibilities: post-  
186 generation of arms in the incompletely developed starfish or intercalated regeneration of arms  
187 in adults [6]. The capacity of regeneration is a remarkable feature of all extant classes of  
188 echinoderms [2]. Thus, it is possible that multi-armed starfishes could transform from five-  
189 rayed forms to multi-rayed forms by growing new arms through regeneration-related  
190 mechanisms. Thus, suggesting that genes in these families may play critical roles in the

191 biosynthesis and metabolism processes of its unique body plan as well as in regeneration  
192 processes.

193 Using *P. borealis* as the foreground branch and six other echinoderm species as the background  
194 branches, we incorporated the branch-site model in the PAML package to detect positively  
195 selected genes. A total of 14 genes were positively selected in *P. borealis* (P-value < 0.05, BEB  
196 > 0.95) and significantly enriched in GO terms related to “lipid metabolism,” “transport of  
197 proton,” “pyruvate metabolism,” and “Hedgehog signaling pathway” (Figure 5, Supplementary  
198 Table 5). It is worth noting that these positively selected genes also included BMP4, which  
199 regulates regeneration and tissue specification (Table 4).

200 Regeneration is a high-energy-required process in which starfishes in the regeneration state  
201 increase the amount of lipid and energy in the pyloric caeca to use [30]. GPR161 and BMP4,  
202 well-known genes to be critical in regeneration, were also detected as positively selected genes.  
203 The G-protein coupled receptor Gpr161 negatively regulates the Hedgehog pathway via cAMP  
204 signaling, which is known to participate tissue regeneration process [31, 32]. Additionally,  
205 previous studies of planarian regeneration indicate that BMP4 is a key for tissue specification,  
206 especially dorsal-ventral polarity, which may explain the distinctive disk of *P. borealis* [33].  
207 Together with those of previous studies, our results further suggest that related genes may have  
208 contributed to the regeneration and development of the unique body plan of *P. borealis*,  
209 multiple arms. Therefore, *P. borealis* can be potentially regarded as a valuable model to  
210 investigate the mechanisms underlying supernumerary arm development and regeneration. We  
211 believe that this high-quality genome will supply a useful and valuable genetic resource for  
212 future research, especially in a unique body plan and regeneration biology.

213

214 **Conclusion**

215 The first chromosome-level *P. borealis* genome was assembled and annotated. Twenty-two  
216 chromosomal scaffolds are constructed with N50 of 24.97 Mb, which showed high  
217 conservation with genomes of three starfish species of the order Forcipulatida. Furthermore,  
218 we identified the accelerated evolution of *P. borealis* in the context of genomics, which may  
219 explain its multi-armed morphology and regenerative capacity. The availability of the high-  
220 quality genome sequence of *P. borealis* is expected to provide many insights into the unique  
221 morphology of multi-armed starfish and their regeneration. Regarding the scientific value of *P.*  
222 *borealis*, the genome and gene inventory resulting from this study will be helpful in future  
223 research on these critical topics.

224

## 225 **Methods**

### 226 **Sampling and genomic DNA extraction**

227 Adult specimens of *P. borealis* were sampled at a depth of 31 meters near Ulleung island, Korea  
228 (latitude: 37.53390, longitude: 130.93920) (Figure 1A). *P. borealis* was dissected with scissors  
229 to obtain gonad, pyloric caecae, stomach, and epidermis of an arm. Isolated tissues were frozen  
230 on dry ice immediately and kept at -80°C until further processing. Then, the frozen tissues were  
231 ground into a fine powder with liquid nitrogen using a pestle and mortar for the nucleic acid  
232 extraction.

233 High molecular weight (HMW) DNA was obtained from gonad following a nuclei isolation  
234 method [34]. Genomic DNA was obtained from gonad following modified CTAB protocol [35]  
235 in the presence of 2% PVP (1% of MW 10,000 and 1% of MW 40,000) PolyVinylPyrrolidone  
236 (Sigma-Aldrich, Burlington, MA, USA). DNA concentration was determined using the Quant-  
237 iT PicoGreen® assay (Invitrogen, Waltham, MA, USA) and the absorbance at 260 nm and

238 230nm (A260/A230) was measured in the Synergy HTX Multi-Mode microplate reader  
239 (Biotek, Rochester, VT, USA). Their quality verified by gel electrophoresis.

#### 240 **High-throughput sequencing of genomic DNA**

241 For Nanopore sequencing, short genomic fragments (<10 kb) were removed using a Short Read  
242 Eliminator Kit (Circulomics, Baltimore, MD, USA). The library was prepared using the ONT  
243 1D ligation Sequencing kit (SQK-LSK109, Oxford Nanopore Technologies, Oxford, UK) with  
244 the native barcoding expansion kit (EXP-NBD104) in accordance with the manufacturer's  
245 protocol. In brief, genomic DNA was repaired using the NEBNext FFPE DNA Repair Mix  
246 (New England BioLabs, Ipswich, MA, USA) and NEBNext Ultra II End Repair/dA-Tailing  
247 Module. The end-prepped DNA was individually barcoded with ONT native barcode by NEB  
248 Blunt/TA Ligase Master Mix (New England BioLabs). Barcoded DNA samples were pooled in  
249 equal molar amounts. It was ligated with adapter using the NEBNext Quick Ligation Module  
250 (New England BioLabs). After every enzyme reaction, the DNA samples were purified using  
251 AMPure XP beads (Beckman Coulter, Brea, CA, USA). The final library was loaded onto  
252 MinION flow cell (FLO-MIN106 and FLO-MIN111, R9.4 and R10.3) (Oxford Nanopore  
253 Technologies) and PromethION flowcell(FLO-PRO002) (Oxford Nanopore Technologies).  
254 Sequencing was performed on a MinION MK1b and PromethION sequencer with MinKNOW  
255 software (19.10.1).

256 We also used an Illumina platform to generate short high-quality sequencing reads. DNA  
257 library was prepared using TruSeq DNA PCR-Free (Illumina, San Diego, CA, USA) and  
258 evaluated the distribution of fragment sizes with TapeStation D1000 (Agilent Technologies,  
259 Santa Clara, CA, USA). Finally, DNA library was sequenced in the Illumina NovaSeq 6000  
260 (Illumina) with the length of 150 bp paired-end reads.

261 Hi-C technology was also employed for chromosome-level genome assembly. Hi-C library

262 construction protocol is as follows. Ground gonad tissue was mixed with 1% formaldehyde for  
263 fixing chromatin then the nuclei was isolated following a nuclei isolation method [1]. Fixed  
264 chromatin was digested with HindII-HF (New England BioLabs), the 5' overhangs filled in  
265 with nucleotides and biotin-14-dCTP(Invitrogen) and ligated free blunt ends. After ligation,  
266 the DNA purified and removed biotin from un-Ligated DNA ends. Fragmentation and size  
267 selection was performed to shear the Hi-C DNA. Hi-C Library preparation is performed using  
268 ThruPLEX® DNA-seq Kit (Takara Bio USA, Inc, Mountain View, CA, USA). HI-C library  
269 was evaluated the distribution of fragment sizes with TapeStation D1000 (Agilent Technologies,  
270 Santa Clara, CA, USA). HI-C library was sequenced in the Illumina NovaSeq 6000 (Illumina)  
271 with the length of 150 bp paired-end reads. All of the obtained reads were quality controlled  
272 by trimming adaptor sequences and low-quality reads using Trimmomatic v0.39 [36] for  
273 Illumina reads and Porechop v0.2.4 [37] (-q 7) and NanoFilt [38] (-k 5000) for Nanopore reads.

#### 274 **Genome size estimation**

275 The quality controlled Illumina sequencing data was used for the calculation of the genome  
276 size. Using the reads, a k-mer map was constructed to evaluate genome size, unique sequence  
277 ratio, and heterozygosity. For this, jellyfish v2.3.0 [39] was first used to compute the  
278 distribution of the 21-mer frequencies. The final 21-mer count distribution per genome was  
279 used within the GenomeScope 2.0 [40].

#### 280 **Genome assembly and scaffolding with Hi-C data**

281 Multiple approaches were tried but the best assembly was obtained in combination of  
282 NextDenovo [41], NextPolish [42] and 3D-DNA [11]. We utilized NextDenovo v2.4.0 to  
283 assemble the *P. borealis* genome using only the Nanopore long reads. After the assembly, we  
284 applied the Illumina short reads to polish the assembled contigs by operating NextPolish v1.1.0.  
285 All software parameter setting were default.



286 To obtain a chromosome-level genome assembly of *P. borealis*, we employed the Hi-C  
287 technology to scaffold assembled contigs. Detailed procedures are as follows. (i) The paired-  
288 end Illumina reads were mapped onto the polished assembly using HiC-Pro v3.0.0 [43] with  
289 default parameters to check the quality of the raw Hi-C reads. (ii) Juicer v1.6 [44] and 3D-  
290 DNA v180419 [11] were applied to cluster the genomic contig sequences into potential  
291 chromosomal groups. (iii) Juicebox v1.13.01 [45] was used to validate the contig orientation  
292 and to remove ambiguous fragments with the assistance of manual correction.

### 293 **Assessment of the chromosome-level genome assembly**

294 Two routine methods were employed to assess the completeness of our finally assembled  
295 genome as follows. (i) Benchmarking Universal Single-Copy Orthologues (BUSCO) v5.2.2 [12]  
296 assessment: The metazoan\_odb10 and eukaryotic\_odb10 orthologues were used as the BUSCO  
297 reference. (ii) QV score and error rate was estimated with Merqury v1.3 [13].

### 298 **RNA extraction and sequencing**

299 Total RNA was isolated using TRIzol Reagent(Invitrogen) from three tissues of same *P.*  
300 *borealis*, digestive gland, stomach and epidermis of arm following the manufacturer's protocol.  
301 Total RNA concentration was determined using the Quant-iT™ RNA Assay Kits (Invitrogen)  
302 and the absorbance at 260 nm and 280 nm (A260/A280) was measured in the Synergy HTX  
303 Multi-Mode microplate reader (Biotek). Their quality verified by gel electrophoresis. mRNA  
304 was isolated using Magnosphere™ UltraPure mRNA purification kit(Takara) according to the  
305 manufacturer's instructions.

306 cDNA library was prepared using cDNA-PCR Sequencing Kit (SQK-PCS109, Oxford  
307 Nanopore Technologies) with the PCR Barcoding Kit (SQK-PBK004, Oxford Nanopore  
308 Technologies) in accordance with the manufacturer's protocol. In brief, RT and strand-

309 switching primers were provided by ONT with the SQK-PCS109 kit. Following RT, PCR  
310 amplification was performed using the LongAmpTaq 2X Master Mix (New England Biolabs)  
311 and AMPure XP beads (Beckman Coulter) were used for DNA purification. The PCR product  
312 was then subjected to ONT adaptor ligation using the SQK-PBK004. The final library was  
313 loaded onto MinION flow cell (FLO-MIN106 and FLO-MIN111, R9.4 and R10.3) (Oxford  
314 Nanopore Technologies) and sequencing was performed on a MinION MK1b and MinKNOW  
315 software (19.10.1).

316 We also used an Illumina platform to generate short high-quality sequencing reads. Using  
317 Truseq Stranded mRNA Prep kit, we constructed cDNA library. After evaluating the  
318 distribution of fragment sizes with BioAnalyzer 2100 (Agilent Technologies, Santa Clara, CA,  
319 USA), it was sequenced in the Illumina NovaSeq 6000 (Illumina, San Diego, CA, USA) with  
320 the length of 100 bp paired-end reads.

### 321 **Hybrid assembly of transcriptome**

322 To assemble transcriptome, we selected hybrid approach to restore more known genes and  
323 discover alternatively spliced isoforms, which can be useful in transcriptome analysis of  
324 previously unsequenced organism. Therefore, long reads and short reads from three tissues  
325 were used for assembly. To ensure the accuracy of subsequent analyses, we trimmed the raw  
326 reads to remove adaptor sequences and low-quality reads. Trimmomatic v0.39 and Porechop  
327 v0.2.4 were used to trim reads for Illumina and Nanopore reads, respectively. Subsequently,  
328 the clean reads were assembled using rnaSPAdes v3.14.1 [46] with default parameters and  
329 transcriptomes with at least 100 amino acids were extracted using TransDecoder [47].

### 330 **Annotation of repetitive elements**

331 Repetitive elements in the final assembly were annotated using the following two different

332 strategies, (i) de novo annotation: RepeatModeler v2.0.1 [48] and LTR\_Finder v2.0.1 [49] were  
333 used to build a local repeat reference. Subsequently, the genome assembly was aligned with  
334 this reference to annotate the de novo predicted repeat elements using RepeatMasker v4.1.1  
335 [50]. (ii) Homology annotation: Our genome assembly was searched in the RepBase  
336 (RepeatMaskerEdition) [51] using RepeatMasker v4.1.1. Finally, these data from the two  
337 strategies were integrated to generate a nonredundant data set of repetitive elements in the final  
338 *P. borealis* genome assembly.

### 339 **Gene prediction and function annotation**

340 Three methods were used to predict the *P. borealis* gene set from the soft masked *P. borealis*  
341 genome. (i) ab initio gene prediction: Augustus v3.4.0 [52, 53], GeneMark-ET v3.62 [54],  
342 Braker v2.1.5 [55-59] and SNAP v2.51.7 [60] were employed to annotate gene models. (ii)  
343 Evidence-based gene prediction: Exonerate [61] were utilized to annotate gene models with  
344 expressed sequence tag (EST) and protein homology dataset. Assembled transcriptome of *P.*  
345 *borealis* were used for EST dataset and protein sequences of *A. rubens* (GCF\_902459465.1)  
346 from NCBI were used for protein homology dataset. (iii) Consensus gene prediction:  
347 EVidenceModeler [62] (EVM) combined predicted ab initio gene models and evidence based  
348 gene models into weighed consensus gene structures. This predicted gene set was searched in  
349 three public functional databases, including NCBI Nr (nonredundant protein sequences),  
350 Swiss-Prot [63] and Pfam database [64] to identify the potential function and functional  
351 domains with BLATP v2.10.0+ [65] and Interproscan5 [66].

### 352 **Gene family expansion and contraction**

353 We downloaded the protein sets of 6 echinoderm species, *Asterias rubens* (GCF\_902459465.1),  
354 *Acanthaster planci* (GCF\_001949145.1), *Patiria miniata* (GCF\_015706575.1), *Lytechinus*  
355 *variegatus* (Lvar2.2), *Parastichopus parvimensis* (Pparv\_v1.0), and *Strongylocentrotus*

356 *purpuratus* (GCF\_000002235.5) from NCBI and EchinoBase (<http://www.echinobase.org>) [67]  
357 to analyze phylogenetic tree and identify the one-to-one orthologous proteins within the 7  
358 examined species through OrthoFinder v2.5.2 [68]. Species tree from OrthoFinder was used to  
359 show phylogenetic relationship. Regarding the tree, we used CAFE5 [16] to detect gene family  
360 expansion and contraction in the assembled *P. borealis* genome with default parameters. GO  
361 enrichment using EnrichGO (clusterProfiler v4.0.4) [69] was derived with the Fisher's exact  
362 test and chi-square test and then adjusted using the Benjamini-Hochberg procedure.

### 363 **Genes under positive selection**

364 Positively selected genes in the *P. borealis* genome were detected from one-to-one orthologous  
365 genes, in which the *P. borealis* was used as the foreground branch, and the *A. rubens*, *A. planci*,  
366 *P. miniata*, *L. variegatus*, *P. parvimensis* and *S. purpuratus* were used as the background  
367 branches. To detect positively selected genes, we used BLASTP v2.10.0+ to screen out 115  
368 one-to-one orthologous genes among 7 species. The multiple alignment was performed by the  
369 GUIDANCE v2.02 software (--msaProgram CLUSTALW, --seqType aa) [70-72] and  
370 PAL2NAL v14 [73] was applied to convert protein sequence alignments into the corresponding  
371 codon alignments. The branch-site model A incorporated in the PAML package (v4.9j) [74]  
372 was employed to detect positively selected genes. The null model used in the branch-site test  
373 (model = 2, NSsites =2, fix\_omega = 1, omega = 1) assumed that the comparison of the  
374 substitution rates at nonsynonymous and synonymous sites (Ka/Ks ratio) for all codons in all  
375 branches must be  $\leq 1$ , whereas the alternative model (model = 2, NSsites =2, fix\_omega = 0)  
376 assumed that the foreground branch included codons evolving at  $Ka/Ks > 1$ . A maximum  
377 likelihood ratio test was used to compare the two models. P-values were calculated through the  
378 chi-square distribution with 1 degree of freedom (df=1). The P-values were then adjusted for  
379 multiple testing using the false discovery rate (FDR) method. Genes were identified as

380 positively selected when the FDR < 0.05. Furthermore, we required that at least one amino-  
381 acid site possessed a high probability of being positively selected (Bayes probability > 95%).  
382 If none of the amino acids passed this cutoff in the positively selected gene, then these genes  
383 were identified as false positives and excluded. GO enrichment using EnrichGO  
384 (clusterProfiler v4.0.4) [69] was derived with the Fisher's exact test and chi-square test and  
385 then adjusted using the Benjamini-Hochberg procedure with a cutoff set at P-value < 0.05.

386

### 387 **Data availability**

388 The final genome assembly and raw data from the Nanopore, Illumina and Hi-C libraries have  
389 been deposited at NCBI under BioProject PRJNA776097. Other supporting datasets are  
390 available in the GigaScience database (GigaDB).

### 391 **Additional Files**

392 Supplementary Figure S1. Genome size estimation

393 Supplementary Figure S2. *Plazaster borealis* genome assembly completeness. (A) Hi-C  
394 interactions among 22 chromosomes. (B) Cumulative length of assembly contained within  
395 scaffolds.

396 Supplementary Table S1. Statistics of raw sequencing data

397 Supplementary Table S2. Statistics of *Plazaster borealis* genome assembly before scaffolding.

398 Supplementary Table S3. GO and KEGG enrichment analysis of expanded and contracted gene  
399 families of seven echinoderm species.

400 Supplementary Table S4. GO and KEGG enrichment analysis of *Plazaster borealis* specific  
401 orthologs.

402 Supplementary Table S5. GO and KEGG enrichment analysis of positively selected genes.

### 403 **Competing Interests**

404 The authors declare that they have no competing interests.

### 405 **Funding**

406 This work was supported by a grant from the National Institute of Biological Resources (NIBR),  
407 funded by the Ministry of Environment (MOE) of the Republic of Korea (NIBR201930201).

408 Ministry of Environment, National Institute of Biological Resources, NIBR201930201, J Yu;

### 409 **Authors' Contribution**

410 J.Y., J.P., and S.K. conceived the project; C.B. collected the sample; B.G. performed laboratory  
411 experiments; Y.L. and B.K. constructed the assembly; Y.L. annotated the assembly; Y.L. and  
412 J.J. performed comparative genome analysis; and Y.L., B.G and S.J. wrote the manuscript with  
413 input from all authors.

### 414 **Acknowledgements**

415 We thank the reviewers for their helpful comments and constructive suggestions on the  
416 manuscript. We also appreciate to the NIBR for the support.

### 417 **References**

- 418 1. Garcia-Arraras JE and Dolmatov IY. Echinoderms: potential model systems for studies on  
419 muscle regeneration. *Curr Pharm Des.* 2010;16 8:942-55. doi:10.2174/138161210790883426.
- 420 2. Carnevali MC. Regeneration in Echinoderms: repair, regrowth, cloning. 2006.
- 421 3. Sprinkle J. Patterns and problems in echinoderm evolution. *Echinoderm Studies.* CRC Press;  
422 2020. p. 1-18.
- 423 4. Nichols D. Pentamerism and the Calcite Skeleton in Echinoderms. *Nature.* 1967;215  
424 5101:665-6. doi:10.1038/215665a0.
- 425 5. Stephenson DG. Pentameral Symmetry in Echinoderms. *Nature.* 1967;216 5119:994-.

- 426 doi:10.1038/216994a0.
- 427 6. Hotchkiss FHC. On the Number of Rays in Starfish1. *American Zoologist*. 2015;40 3:340-54.  
428 doi:10.1093/icb/40.3.340.
- 429 7. Sook S. A Systematic Study on the Asteroidea in the East Sea, Korea. *Animal Systematics,*  
430 *Evolution and Diversity*. 1995;11 2:243-63.
- 431 8. Uchida T. Report of the Biological Survey of Mutsu Bay. 11. Starfishes of Mutsu Bay. *Scientific*  
432 *Reports of Tohoku Imperial University*. 1928.
- 433 9. Hayashi R. Contributions to the Classification of the Sea-stars of Japan.: II. Forcipulata, with  
434 the Note on the Relationships between the Skeletal Structure and Respiratory Organs of the  
435 Sea-stars (With 11 Plates and 115 textfigures). *北海道帝國大學理學部紀要*. 1943;8 3:133-281.
- 436 10. Matsuoka N, Fukuda K, Yoshida K, Sugawara M and Inamori M. Biochemical systematics of  
437 five asteroids of the family Asteriidae based on allozyme variation. *Zoological science*.  
438 1994;11 2:p343-9.
- 439 11. Dudchenko O, Batra SS, Omer AD, Nyquist SK, Hoeger M, Durand NC, et al. De novo  
440 assembly of the *Aedes aegypti* genome using Hi-C yields chromosome-length scaffolds.  
441 *Science*. 2017;356 6333:92-5. doi:10.1126/science.aal3327.
- 442 12. Simao FA, Waterhouse RM, Ioannidis P, Kriventseva EV and Zdobnov EM. BUSCO: assessing  
443 genome assembly and annotation completeness with single-copy orthologs. *Bioinformatics*.  
444 2015;31 19:3210-2. doi:10.1093/bioinformatics/btv351.
- 445 13. Rhie A, Walenz BP, Koren S and Phillippy AM. Merqury: reference-free quality, completeness,  
446 and phasing assessment for genome assemblies. *Genome Biol*. 2020;21 1:245.  
447 doi:10.1186/s13059-020-02134-9.
- 448 14. Wang Y, Tang H, Debarry JD, Tan X, Li J, Wang X, et al. MCScanX: a toolkit for detection and  
449 evolutionary analysis of gene synteny and collinearity. *Nucleic Acids Res*. 2012;40 7:e49.  
450 doi:10.1093/nar/gkr1293.
- 451 15. Perez-Wohlfeil E, Diaz-Del-Pino S and Trelles O. Ultra-fast genome comparison for large-  
452 scale genomic experiments. *Sci Rep*. 2019;9 1:10274. doi:10.1038/s41598-019-46773-w.
- 453 16. Mendes FK, Vanderpool D, Fulton B and Hahn MW. CAFE 5 models variation in evolutionary  
454 rates among gene families. *Bioinformatics*. 2020; doi:10.1093/bioinformatics/btaa1022.
- 455 17. Artavanis-Tsakonas S, Rand MD and Lake RJ. Notch signaling: cell fate control and signal  
456 integration in development. *Science*. 1999;284 5415:770-6. doi:10.1126/science.284.5415.770.
- 457 18. Lai EC. Notch signaling: control of cell communication and cell fate. *Development*. 2004;131  
458 5:965-73. doi:10.1242/dev.01074.
- 459 19. Sato C, Zhao G and Ilagan MX. An overview of notch signaling in adult tissue renewal and  
460 maintenance. *Curr Alzheimer Res*. 2012;9 2:227-40. doi:10.2174/156720512799361600.
- 461 20. Bocci F, Onuchic JN and Jolly MK. Understanding the Principles of Pattern Formation Driven  
462 by Notch Signaling by Integrating Experiments and Theoretical Models. *Front Physiol*.  
463 2020;11:929. doi:10.3389/fphys.2020.00929.
- 464 21. de Celis JF, Tyler DM, de Celis J and Bray SJ. Notch signalling mediates segmentation of the

- 465 *Drosophila* leg. Development. 1998;125 23:4617-26.
- 466 22. Cordoba S and Estella C. Role of Notch Signaling in Leg Development in *Drosophila*  
467 *melanogaster*. Adv Exp Med Biol. 2020;1218:103-27. doi:10.1007/978-3-030-34436-8\_7.
- 468 23. Lapraz F, Besnardeau L and Lepage T. Patterning of the Dorsal-Ventral Axis in Echinoderms:  
469 Insights into the Evolution of the BMP-Chordin Signaling Network. PLOS Biology. 2009;7  
470 11:e1000248. doi:10.1371/journal.pbio.1000248.
- 471 24. Dhanasekaran DN and Reddy EP. JNK signaling in apoptosis. Oncogene. 2008;27 48:6245-  
472 51. doi:10.1038/onc.2008.301.
- 473 25. Heisenberg CP and Bellaiche Y. Forces in tissue morphogenesis and patterning. Cell.  
474 2013;153 5:948-62. doi:10.1016/j.cell.2013.05.008.
- 475 26. Mashanov V, Akiona J, Khoury M, Ferrier J, Reid R, Machado DJ, et al. Active Notch signaling  
476 is required for arm regeneration in a brittle star. PLoS One. 2020;15 5:e0232981.  
477 doi:10.1371/journal.pone.0232981.
- 478 27. Reinardy HC, Emerson CE, Manley JM and Bodnar AG. Tissue regeneration and  
479 biomineralization in sea urchins: role of Notch signaling and presence of stem cell markers.  
480 PLoS One. 2015;10 8:e0133860. doi:10.1371/journal.pone.0133860.
- 481 28. Shao Y, Wang XB, Zhang JJ, Li ML, Wu SS, Ma XY, et al. Genome and single-cell RNA-  
482 sequencing of the earthworm *Eisenia andrei* identifies cellular mechanisms underlying  
483 regeneration. Nat Commun. 2020;11 1:2656. doi:10.1038/s41467-020-16454-8.
- 484 29. Frederick HCH. A "Rays-as-Appendages" Model for the Origin of Pentamerism in  
485 Echinoderms. Paleobiology. 1998;24 2:200-14.
- 486 30. Rubilar T, Villares G, Epherra L, Díaz-de-Vivar ME and Pastor-de-Ward CT. Fission,  
487 regeneration, gonad production and lipids storage in the pyloric caeca of the sea star  
488 *Allostichaster capensis*. Journal of Experimental Marine Biology and Ecology. 2011;409 1:247-  
489 52. doi:<https://doi.org/10.1016/j.jembe.2011.09.004>.
- 490 31. Warner JF, Miranda EL and McClay DR. Contribution of hedgehog signaling to the  
491 establishment of left-right asymmetry in the sea urchin. Dev Biol. 2016;411 2:314-24.  
492 doi:10.1016/j.ydbio.2016.02.008.
- 493 32. Mukhopadhyay S, Wen X, Ratti N, Loktev A, Rangell L, Scales SJ, et al. The ciliary G-protein-  
494 coupled receptor Gpr161 negatively regulates the Sonic hedgehog pathway via cAMP  
495 signaling. Cell. 2013;152 1-2:210-23. doi:10.1016/j.cell.2012.12.026.
- 496 33. Reddien PW. Constitutive gene expression and the specification of tissue identity in adult  
497 planarian biology. Trends Genet. 2011;27 7:277-85. doi:10.1016/j.tig.2011.04.004.
- 498 34. Zhang M, Zhang Y, Scheuring CF, Wu CC, Dong JJ and Zhang HB. Preparation of megabase-  
499 sized DNA from a variety of organisms using the nuclei method for advanced genomics  
500 research. Nat Protoc. 2012;7 3:467-78. doi:10.1038/nprot.2011.455.
- 501 35. Porebski S, Bailey LG and Baum BR. Modification of a CTAB DNA extraction protocol for  
502 plants containing high polysaccharide and polyphenol components. Plant Molecular Biology  
503 Reporter. 1997;15 1:8-15. doi:10.1007/BF02772108.



- 504 36. Bolger AM, Lohse M and Usadel B. Trimmomatic: a flexible trimmer for Illumina sequence  
505 data. *Bioinformatics*. 2014;30 15:2114-20. doi:10.1093/bioinformatics/btu170.
- 506 37. Porechop. <https://github.com/rrwick/Porechop> (2017).
- 507 38. De Coster W, D'Hert S, Schultz DT, Cruts M and Van Broeckhoven C. NanoPack: visualizing  
508 and processing long-read sequencing data. *Bioinformatics*. 2018;34 15:2666-9.  
509 doi:10.1093/bioinformatics/bty149.
- 510 39. Marçais G and Kingsford C. A fast, lock-free approach for efficient parallel counting of  
511 occurrences of k-mers. *Bioinformatics*. 2011;27 6:764-70. doi:10.1093/bioinformatics/btr011.
- 512 40. Ranallo-Benavidez TR, Jaron KS and Schatz MC. GenomeScope 2.0 and Smudgeplot for  
513 reference-free profiling of polyploid genomes. *Nat Commun*. 2020;11 1:1432.  
514 doi:10.1038/s41467-020-14998-3.
- 515 41. NextOmics: NextDeNovo. <https://github.com/Nextomics/NextDenovo> (2019).
- 516 42. Hu J, Fan J, Sun Z and Liu S. NextPolish: a fast and efficient genome polishing tool for long-  
517 read assembly. *Bioinformatics*. 2020;36 7:2253-5. doi:10.1093/bioinformatics/btz891.
- 518 43. Servant N, Varoquaux N, Lajoie BR, Viara E, Chen CJ, Vert JP, et al. HiC-Pro: an optimized  
519 and flexible pipeline for Hi-C data processing. *Genome Biol*. 2015;16:259.  
520 doi:10.1186/s13059-015-0831-x.
- 521 44. Durand NC, Shamim MS, Machol I, Rao SS, Huntley MH, Lander ES, et al. Juicer Provides a  
522 One-Click System for Analyzing Loop-Resolution Hi-C Experiments. *Cell Syst*. 2016;3 1:95-8.  
523 doi:10.1016/j.cels.2016.07.002.
- 524 45. Durand NC, Robinson JT, Shamim MS, Machol I, Mesirov JP, Lander ES, et al. Juicebox  
525 Provides a Visualization System for Hi-C Contact Maps with Unlimited Zoom. *Cell Syst*.  
526 2016;3 1:99-101. doi:10.1016/j.cels.2015.07.012.
- 527 46. Bushmanova E, Antipov D, Lapidus A and Prjibelski AD. rnaSPAdes: a de novo transcriptome  
528 assembler and its application to RNA-Seq data. *Gigascience*. 2019;8 9  
529 doi:10.1093/gigascience/giz100.
- 530 47. TransDecoder. <https://github.com/TransDecoder/TransDecoder> (2015).
- 531 48. Flynn JM, Hubley R, Goubert C, Rosen J, Clark AG, Feschotte C, et al. RepeatModeler2 for  
532 automated genomic discovery of transposable element families. *Proc Natl Acad Sci U S A*.  
533 2020;117 17:9451-7. doi:10.1073/pnas.1921046117.
- 534 49. Xu Z and Wang H. LTR\_FINDER: an efficient tool for the prediction of full-length LTR  
535 retrotransposons. *Nucleic Acids Res*. 2007;35 Web Server issue:W265-8.  
536 doi:10.1093/nar/gkm286.
- 537 50. Smit A, Hubley, R & Green, P: RepeatMasker Open-4.0. <http://www.repeatmasker.org> (2013-  
538 2015).
- 539 51. Bao W, Kojima KK and Kohany O. Repbase Update, a database of repetitive elements in  
540 eukaryotic genomes. *Mob DNA*. 2015;6:11. doi:10.1186/s13100-015-0041-9.
- 541 52. Stanke M, Diekhans M, Baertsch R and Haussler D. Using native and syntenically mapped  
542 cDNA alignments to improve de novo gene finding. *Bioinformatics*. 2008;24 5:637-44.

543 doi:10.1093/bioinformatics/btn013.

544 53. Stanke M, Schoffmann O, Morgenstern B and Waack S. Gene prediction in eukaryotes with  
545 a generalized hidden Markov model that uses hints from external sources. *BMC*  
546 *Bioinformatics*. 2006;7:62. doi:10.1186/1471-2105-7-62.

547 54. Lomsadze A, Burns PD and Borodovsky M. Integration of mapped RNA-Seq reads into  
548 automatic training of eukaryotic gene finding algorithm. *Nucleic Acids Res*. 2014;42 15:e119.  
549 doi:10.1093/nar/gku557.

550 55. Hoff KJ, Lange S, Lomsadze A, Borodovsky M and Stanke M. BRAKER1: Unsupervised RNA-  
551 Seq-Based Genome Annotation with GeneMark-ET and AUGUSTUS. *Bioinformatics*. 2016;32  
552 5:767-9. doi:10.1093/bioinformatics/btv661.

553 56. Hoff KJ, Lomsadze A, Borodovsky M and Stanke M. Whole-Genome Annotation with BRAKER.  
554 *Methods Mol Biol*. 2019;1962:65-95. doi:10.1007/978-1-4939-9173-0\_5.

555 57. Li H, Handsaker B, Wysoker A, Fennell T, Ruan J, Homer N, et al. The Sequence  
556 Alignment/Map format and SAMtools. *Bioinformatics*. 2009;25 16:2078-9.  
557 doi:10.1093/bioinformatics/btp352.

558 58. Barnett DW, Garrison EK, Quinlan AR, Stromberg MP and Marth GT. BamTools: a C++ API  
559 and toolkit for analyzing and managing BAM files. *Bioinformatics*. 2011;27 12:1691-2.  
560 doi:10.1093/bioinformatics/btr174.

561 59. Buchfink B, Xie C and Huson DH. Fast and sensitive protein alignment using DIAMOND. *Nat*  
562 *Methods*. 2015;12 1:59-60. doi:10.1038/nmeth.3176.

563 60. Leskovec J and Soscic R. SNAP: A General Purpose Network Analysis and Graph Mining  
564 Library. *ACM Trans Intell Syst Technol*. 2016;8 1 doi:10.1145/2898361.

565 61. Slater GS and Birney E. Automated generation of heuristics for biological sequence  
566 comparison. *BMC Bioinformatics*. 2005;6:31. doi:10.1186/1471-2105-6-31.

567 62. Haas BJ, Salzberg SL, Zhu W, Pertea M, Allen JE, Orvis J, et al. Automated eukaryotic gene  
568 structure annotation using EvidenceModeler and the Program to Assemble Spliced  
569 Alignments. *Genome Biol*. 2008;9 1:R7. doi:10.1186/gb-2008-9-1-r7.

570 63. Bairoch A and Apweiler R. The SWISS-PROT protein sequence database and its supplement  
571 TrEMBL in 2000. *Nucleic Acids Res*. 2000;28 1:45-8. doi:10.1093/nar/28.1.45.

572 64. Mistry J, Chuguransky S, Williams L, Qureshi M, Salazar Gustavo A, Sonnhammer ELL, et al.  
573 Pfam: The protein families database in 2021. *Nucleic Acids Research*. 2020;49 D1:D412-D9.  
574 doi:10.1093/nar/gkaa913.

575 65. Camacho C, Coulouris G, Avagyan V, Ma N, Papadopoulos J, Bealer K, et al. BLAST+:  
576 architecture and applications. *BMC Bioinformatics*. 2009;10:421. doi:10.1186/1471-2105-10-  
577 421.

578 66. Jones P, Binns D, Chang HY, Fraser M, Li W, McAnulla C, et al. InterProScan 5: genome-scale  
579 protein function classification. *Bioinformatics*. 2014;30 9:1236-40.  
580 doi:10.1093/bioinformatics/btu031.

581 67. Kudtarkar P and Cameron RA. Echinobase: an expanding resource for echinoderm genomic

- 582 information. Database (Oxford). 2017;2017 doi:10.1093/database/bax074.
- 583 68. Emms DM and Kelly S. OrthoFinder: phylogenetic orthology inference for comparative  
584 genomics. *Genome Biology*. 2019;20 1:238. doi:10.1186/s13059-019-1832-y.
- 585 69. Wu T, Hu E, Xu S, Chen M, Guo P, Dai Z, et al. clusterProfiler 4.0: A universal enrichment tool  
586 for interpreting omics data. *Innovation (N Y)*. 2021;2 3:100141.  
587 doi:10.1016/j.xinn.2021.100141.
- 588 70. Penn O, Privman E, Ashkenazy H, Landan G, Graur D and Pupko T. GUIDANCE: a web server  
589 for assessing alignment confidence scores. *Nucleic Acids Res*. 2010;38 Web Server  
590 issue:W23-8. doi:10.1093/nar/gkq443.
- 591 71. Sela I, Ashkenazy H, Katoh K and Pupko T. GUIDANCE2: accurate detection of unreliable  
592 alignment regions accounting for the uncertainty of multiple parameters. *Nucleic Acids Res*.  
593 2015;43 W1:W7-14. doi:10.1093/nar/gkv318.
- 594 72. Landan G and Graur D. Local reliability measures from sets of co-optimal multiple sequence  
595 alignments. *Pac Symp Biocomput*. 2008:15-24.
- 596 73. Suyama M, Torrents D and Bork P. PAL2NAL: robust conversion of protein sequence  
597 alignments into the corresponding codon alignments. *Nucleic Acids Res*. 2006;34 Web  
598 Server issue:W609-12. doi:10.1093/nar/gkl315.
- 599 74. Yang Z. PAML 4: phylogenetic analysis by maximum likelihood. *Mol Biol Evol*. 2007;24  
600 8:1586-91. doi:10.1093/molbev/msm088.
- 601 74. Emms D.M. and Kelly S. STAG: Species Tree Inference from All Genes. bioRxiv doi:  
602 <https://doi.org/10.1101/267914>

603

604

## 605 **Figures**

606 **Figure 1:** A. Adult *Plazaster borealis*. Photograph by National Institute of Biological  
607 Resources (NIBR, <https://www.nibr.go.kr>) B. Sampling spot of *P. borealis* studied in this  
608 research.

609 **Figure 2:** A phylogenetic tree of *P. borealis* and six other species. This tree was constructed  
610 using protein sequences of seven species, showing gene family expansion and contraction. The  
611 number below the branches represents the number of gene families with either expansion (blue)  
612 and contraction (red). The ratio of expanded and contracted gene families was expressed in the

613 pie chart above the branches. The numbers at the node indicate the bootstrap value. The species  
614 used in the tree are *P. borealis*, *Asterias rubens*, *Acanthaster planci*, *Patiria miniata*, *Lytechinus*  
615 *variegatus*, *Parastichopus parvimensis*, and *Strongylocentrotus purpuratus*.

616 **Figure 3:** Syntenic relationship of *P. borealis* and species of the order Forcipulatida. A.  
617 Synteny between *Asterias rubens* and *P. borealis*. The syntenic blocks were calculated with  
618 MCscan. B-D. Syntenic relationship of *P. borealis* between *A. rubens* (B), *Pisaster ochraceus*  
619 (C), *Marthasterias glacialis* (D) Genomic sequences were compared with Chromeister based  
620 on inexact k-mer matching.

621 **Figure 4:** GO enrichment analysis of expanded gene families of *P. borealis*.

622 **Figure 5:** Results of GO enrichment analysis of positively selected genes. BP: GO Term  
623 Biological Process (green), CC: GO Term Cellular Component (red), KEGG: Kyoto  
624 Encyclopedia of Genes and Genomes (blue).

625

626

627

628

629

630

631

632

633

634 **Tables**635 **Table 1:** *Plazaster borealis* assembly statistics

| Assembly statistics                  | Value          |
|--------------------------------------|----------------|
| Genome size (bp)                     | 561,050,340    |
| Number of scaffolds                  | 801            |
| Number of chromosome-scale scaffolds | 22             |
| N50 of scaffolds (bp)                | 24,975,817     |
| L50 of scaffolds                     | 10             |
| Chromosome-scale scaffolds (bp)      | 518,884,334    |
| GC content of the genome (%)         | 38.89          |
| QV score                             | 36.3457        |
| Error rate                           | 0.00023        |
| BUSCO analysis                       |                |
| Library                              | Metazoan_odb10 |
| Complete                             | 935 (98.0%)    |
| Complete and single-copy             | 925 (97.0%)    |
| Complete and duplicated              | 10 (1.0%)      |
| Fragmented                           | 11 (1.2%)      |
| Missing                              | 8 (0.8%)       |

636

637 **Table 2:** *Plazaster borealis* repetitive DNA elements

| Type           | Number of elements | Length occupied (bp) | Percentage of sequence (%) |
|----------------|--------------------|----------------------|----------------------------|
| DNA            | 10,734             | 3,597,965            | 0.64                       |
| LINE           | 42,851             | 3,472,043            | 0.62                       |
| SINE           | 60,394             | 13,931,402           | 2.48                       |
| LTR            | 8,277              | 5,145,127            | 0.92                       |
| Satellite      | 9                  | 2,752                | 0                          |
| Small RNA      | 20,889             | 1,464,546            | 0.26                       |
| Simple repeat  | 162,149            | 8,016,020            | 1.43                       |
| Unclassified   | 1,294,477          | 249,314,223          | 44.44                      |
| Low complexity | 25,170             | 1,365,485            | 0.24                       |
| Total          |                    |                      | 51.05%                     |

638

639 **Table 3:** *Plazaster borealis* genome annotation statistics

| Statistic                                | Value       |
|------------------------------------------|-------------|
| Number of predicted genes                | 26,836      |
| Number of predicted protein-coding genes | 25,224      |
| Average gene length                      | 8,948.89    |
| Number of transcripts                    | 26,737      |
| Average transcript length (bp)           | 1,502.90    |
| Number of exons                          | 192,343     |
| Average exon length (bp)                 | 213.57      |
| Average exon per transcript              | 7.19        |
| Number of introns                        | 165,606     |
| Average intron length (bp)               | 1,261.88    |
| Number of genes annotated to Swiss-Prot  | 18,451      |
| Number of genes annotated to PFAM        | 18,541      |
| Number of genes annotated to NR          | 24,229      |
| BUSCO analysis                           |             |
| Complete (%)                             | 884 (92.6%) |
| Complete and single-copy (%)             | 859 (90.0%) |
| Complete and duplicated (%)              | 25 (2.6%)   |
| Fragmented (%)                           | 44 (4.6%)   |
| Missing (%)                              | 26 (2.8%)   |

640

641 **Table 4:** Genes with accelerated evolution in the *P. borealis*.

| Gene      | H0_lnl   | H1_lnl   | Likelihood ratio | FDR      | # of positively selected sites* |
|-----------|----------|----------|------------------|----------|---------------------------------|
| GPR161    | -8827.28 | -8798.95 | 56.66761         | 2.06E-13 | 5                               |
| RPL5      | -3991.54 | -3968.12 | 46.84587         | 2.3E-11  | 1                               |
| RSL24D1   | -2215.1  | -2192.93 | 44.35075         | 6.59E-11 | 14                              |
| PHB2      | -4815.8  | -4805.98 | 19.631658        | 1.61E-05 | 4                               |
| NAA10     | -4703.42 | -4694.3  | 18.237898        | 2.92E-05 | 4                               |
| IQCA1     | -9112.13 | -9103.79 | 16.684644        | 5.88E-05 | 2                               |
| SLC30A5   | -10574.5 | -10566.6 | 15.766218        | 8.6E-05  | 3                               |
| BMP10     | -8017.18 | -8010.17 | 14.034764        | 0.000196 | 4                               |
| STOML2    | -5414.16 | -5408.06 | 12.206464        | 0.000476 | 1                               |
| ACYPI     | -1855.62 | -1849.54 | 12.153438        | 0.000452 | 3                               |
| NIPSNAP3A | -4951.12 | -4946.47 | 9.296206         | 0.001968 | 1                               |

642 H0\_lnl: log likelihood given H0 ( $\omega$  does not vary across the branches), H1\_lnl: log likelihood

643 given H1, \*Number of positively selected sites with a BEB of  $> 0.95$ .

644
