# Supplementary material for: Chromosome-level genome assembly of Plazaster borealis sheds light on the morphogenesis of multiarmed starfish and its regenerative capacity
Source: PubMed Central journal article supplement (PMC9270726; doi:10.1093/gigascience/giac063), 2022-07-09
Supplement: giac063_giga-d-21-00378_revision_2.pdf [file giac063_giga-d-21-00378_revision_2.pdf]

# GigaScience

## Chromosome-level genome assembly of *Plazaster borealis*: shed light on the morphogenesis of multi-armed starfish and its regenerative capacity --Manuscript Draft--

|                                                      |                                                                                                                                                                                                                                                                                                                                                                                                                                                                                                                                                                                                                                                                                                                                                                                                                                                                                                                                                                                                                                                                                                                                                                                                                                                                                                                       |                 |
|------------------------------------------------------|-----------------------------------------------------------------------------------------------------------------------------------------------------------------------------------------------------------------------------------------------------------------------------------------------------------------------------------------------------------------------------------------------------------------------------------------------------------------------------------------------------------------------------------------------------------------------------------------------------------------------------------------------------------------------------------------------------------------------------------------------------------------------------------------------------------------------------------------------------------------------------------------------------------------------------------------------------------------------------------------------------------------------------------------------------------------------------------------------------------------------------------------------------------------------------------------------------------------------------------------------------------------------------------------------------------------------|-----------------|
| <b>Manuscript Number:</b>                            | GIGA-D-21-00378R2                                                                                                                                                                                                                                                                                                                                                                                                                                                                                                                                                                                                                                                                                                                                                                                                                                                                                                                                                                                                                                                                                                                                                                                                                                                                                                     |                 |
| <b>Full Title:</b>                                   | Chromosome-level genome assembly of <i>Plazaster borealis</i> : shed light on the morphogenesis of multi-armed starfish and its regenerative capacity                                                                                                                                                                                                                                                                                                                                                                                                                                                                                                                                                                                                                                                                                                                                                                                                                                                                                                                                                                                                                                                                                                                                                                 |                 |
| <b>Article Type:</b>                                 | Data Note                                                                                                                                                                                                                                                                                                                                                                                                                                                                                                                                                                                                                                                                                                                                                                                                                                                                                                                                                                                                                                                                                                                                                                                                                                                                                                             |                 |
| <b>Funding Information:</b>                          | National Institute of Biological Resources (NIBR201930201)                                                                                                                                                                                                                                                                                                                                                                                                                                                                                                                                                                                                                                                                                                                                                                                                                                                                                                                                                                                                                                                                                                                                                                                                                                                            | PhD Jaewoong Yu |
| <b>Abstract:</b>                                     | <p><b>Background:</b> <i>Plazaster borealis</i> has a unique morphology displaying multiple arms with a clear distinction between disk and arms, rather than displaying pentaradial symmetry, a remarkable characteristic of Echinoderms. Herein we report the first chromosome-level reference genome of <i>P. borealis</i> and an essential tool to further investigate the basis of the divergent morphology.</p> <p><b>Findings:</b> Total 57.76 Gb of a long read and 70.83 Gb of short-read data were generated to assemble de novo 561Mb reference genome of <i>P. borealis</i>, and Hi-C sequencing data (57.47 Gb) was used for scaffolding into 22 chromosomal scaffolds comprising 92.38% of the genome. The genome completeness estimated by BUSCO is of 98.0% using the metazoan set, indicating a high-quality assembly. Through the comparative genome analysis, we identified evolutionary accelerated genes known to be involved in morphogenesis and regeneration, suggesting their potential role in shaping body pattern and capacity of regeneration.</p> <p><b>Conclusion:</b> This first chromosome-level genome assembly of <i>P. borealis</i> provides fundamental insights into echinoderm biology, as well as the genomic mechanism underlying its unique morphology and regeneration.</p> |                 |
| <b>Corresponding Author:</b>                         | Jaewoong Yu<br>eGnome Inc<br>Seoul, KOREA, REPUBLIC OF                                                                                                                                                                                                                                                                                                                                                                                                                                                                                                                                                                                                                                                                                                                                                                                                                                                                                                                                                                                                                                                                                                                                                                                                                                                                |                 |
| <b>Corresponding Author Secondary Information:</b>   |                                                                                                                                                                                                                                                                                                                                                                                                                                                                                                                                                                                                                                                                                                                                                                                                                                                                                                                                                                                                                                                                                                                                                                                                                                                                                                                       |                 |
| <b>Corresponding Author's Institution:</b>           | eGnome Inc                                                                                                                                                                                                                                                                                                                                                                                                                                                                                                                                                                                                                                                                                                                                                                                                                                                                                                                                                                                                                                                                                                                                                                                                                                                                                                            |                 |
| <b>Corresponding Author's Secondary Institution:</b> |                                                                                                                                                                                                                                                                                                                                                                                                                                                                                                                                                                                                                                                                                                                                                                                                                                                                                                                                                                                                                                                                                                                                                                                                                                                                                                                       |                 |
| <b>First Author:</b>                                 | Yujung Lee                                                                                                                                                                                                                                                                                                                                                                                                                                                                                                                                                                                                                                                                                                                                                                                                                                                                                                                                                                                                                                                                                                                                                                                                                                                                                                            |                 |
| <b>First Author Secondary Information:</b>           |                                                                                                                                                                                                                                                                                                                                                                                                                                                                                                                                                                                                                                                                                                                                                                                                                                                                                                                                                                                                                                                                                                                                                                                                                                                                                                                       |                 |
| <b>Order of Authors:</b>                             | Yujung Lee<br>Bongsang Kim<br>Jaehoon Jung<br>Bomin Koh<br>So Yun Jhang<br>Chaeyoung Ban<br>Won-Jae Chi<br>Soonok Kim<br>Jaewoong Yu                                                                                                                                                                                                                                                                                                                                                                                                                                                                                                                                                                                                                                                                                                                                                                                                                                                                                                                                                                                                                                                                                                                                                                                  |                 |
| <b>Order of Authors Secondary Information:</b>       |                                                                                                                                                                                                                                                                                                                                                                                                                                                                                                                                                                                                                                                                                                                                                                                                                                                                                                                                                                                                                                                                                                                                                                                                                                                                                                                       |                 |
| <b>Response to Reviewers:</b>                        | Reviewer #2:<br>1.Suggestions and editions of the language.                                                                                                                                                                                                                                                                                                                                                                                                                                                                                                                                                                                                                                                                                                                                                                                                                                                                                                                                                                                                                                                                                                                                                                                                                                                           |                 |

|                                                                                                                                                                                                                                                                                                                                                                                                                                                                                                                                     |                                                           |
|-------------------------------------------------------------------------------------------------------------------------------------------------------------------------------------------------------------------------------------------------------------------------------------------------------------------------------------------------------------------------------------------------------------------------------------------------------------------------------------------------------------------------------------|-----------------------------------------------------------|
|                                                                                                                                                                                                                                                                                                                                                                                                                                                                                                                                     | We revised all the suggested sentences in the manuscript. |
| <b>Additional Information:</b>                                                                                                                                                                                                                                                                                                                                                                                                                                                                                                      |                                                           |
| <b>Question</b>                                                                                                                                                                                                                                                                                                                                                                                                                                                                                                                     | <b>Response</b>                                           |
| Are you submitting this manuscript to a special series or article collection?                                                                                                                                                                                                                                                                                                                                                                                                                                                       | No                                                        |
| <p><b>Experimental design and statistics</b></p> <p>Full details of the experimental design and statistical methods used should be given in the Methods section, as detailed in our <a href="#">Minimum Standards Reporting Checklist</a>. Information essential to interpreting the data presented should be made available in the figure legends.</p> <p>Have you included all the information requested in your manuscript?</p>                                                                                                  | Yes                                                       |
| <p><b>Resources</b></p> <p>A description of all resources used, including antibodies, cell lines, animals and software tools, with enough information to allow them to be uniquely identified, should be included in the Methods section. Authors are strongly encouraged to cite <a href="#">Research Resource Identifiers</a> (RRIDs) for antibodies, model organisms and tools, where possible.</p> <p>Have you included the information requested as detailed in our <a href="#">Minimum Standards Reporting Checklist</a>?</p> | Yes                                                       |
| <p><b>Availability of data and materials</b></p> <p>All datasets and code on which the conclusions of the paper rely must be either included in your submission or deposited in <a href="#">publicly available repositories</a> (where available and ethically appropriate), referencing such data using a unique identifier in the references and in the “Availability of Data and Materials”</p>                                                                                                                                  | Yes                                                       |

section of your manuscript.

Have you have met the above requirement as detailed in our [Minimum Standards Reporting Checklist?](#)

1 **Chromosome-level genome assembly of *Plazaster borealis* shed light on the morphogenesis**  
2 **of multi-armed starfish and its regenerative capacity**

3 Yujung Lee<sup>1</sup> [0000-0003-2279-3147]; Bongsang Kim<sup>1,2</sup> [0000-0001-7526-8421]; Jaehoon  
4 Jung<sup>1,2</sup> [0000-0003-2019-0895]; Bomin Koh<sup>1</sup> [0000-0001-6702-6449]; So Yun Jhang<sup>1,3</sup> [0000-  
5 0002-2152-3746]; Chaeyoung Ban<sup>1</sup> [0000-0003-4566-4313]; Won-Jae Chi<sup>4</sup> [0000-0003-2893-  
6 7930]; Soonok Kim<sup>4</sup> [0000-0003-1654-3643]; Jaewoong Yu<sup>1,\*</sup> [0000-0002-4120-8890];

7 <sup>1</sup>eGnome, Inc., 26 Beobwon-ro 9-gil, Sonpa-gu, Seoul 05836, Republic of Korea;

8 <sup>2</sup>Department of Agricultural and Life Sciences and Research Institute of Population Genomics,  
9 Seoul National University, Seoul, Republic of Korea;

10 <sup>3</sup>Interdisciplinary Program in Bioinformatics, Seoul National University, Seoul, 151-742,  
11 Republic of Korea;

12 <sup>4</sup>Microorganism Resources Division, National Institute of Biological Resources, Incheon  
13 22689, Republic of Korea;

14 \*Correspondence address: Jaewoong Yu, eGnome Inc., 26 Beobwon-ro 9-gil, Sonpa-gu, Seoul  
15 05836, Korea. Email: jwyu@egnome.co.kr; Tel.: +82-070-4694-6355

16 **Email addresses/ ORCIDs**

17 Yujung Lee<sup>1</sup>: lyjung711@gmail.com, lyjung7@egnome.co.kr / 0000-0003-2279-3147

18 Bongsang Kim<sup>1,2</sup>: babybird93@snu.ac.kr, kimbongsang@egnome.co.kr / 0000-0001-7526-8421

19 Jaehoon Jung<sup>1,2</sup>: motto@snu.ac.kr, motto@egnome.co.kr / 0000-0003-2019-0895

20 Bomin Koh<sup>1</sup>: chloekoh@egnome.co.kr / 0000-0001-6702-6449

21 So Yun Jhang<sup>1,3</sup>: soyun4595@snu.ac.kr, soyun4595@egnome.co.kr / 0000-0002-2152-3746

22 Chaeyoung Ban<sup>1</sup>: terryban@egnome.co.kr / 0000-0003-4566-4313

23 Won-Jae Chi<sup>3,4</sup>: wjchi76@korea.kr / 0000-0003-2893-7930

24 Soonok Kim<sup>4</sup>: sokim90@korea.kr / 0000-0003-1654-3643

25 Jaewoong Yu<sup>1,\*</sup>: jwyu@egnome.co.kr / 0000-0002-4120-8890

## 26 **Abstract**

27 **Background:** *Plazaster borealis* has a unique morphology displaying multiple arms with a  
28 clear distinction between disk and arms, rather than displaying pentaradial symmetry, a  
29 remarkable characteristic of Echinoderms. Herein we report the first chromosome-level  
30 reference genome of *P. borealis* and an essential tool to further investigate the basis of the  
31 divergent morphology.

32 **Findings:** Total 57.76 Gb of a long read and 70.83 Gb of short-read data were generated to  
33 assemble *de novo* 561Mb reference genome of *P. borealis*, and Hi-C sequencing data (57.47  
34 Gb) was used for scaffolding into 22 chromosomal scaffolds comprising 92.38% of the genome.  
35 The genome completeness estimated by BUSCO is of 98.0% using the metazoan set, indicating  
36 a high-quality assembly. Through the comparative genome analysis, we identified evolutionary  
37 accelerated genes known to be involved in morphogenesis and regeneration, suggesting their  
38 potential role in shaping body pattern and capacity of regeneration.

39 **Conclusion:** This first chromosome-level genome assembly of *P. borealis* provides  
40 fundamental insights into echinoderm biology, as well as the genomic mechanism underlying  
41 its unique morphology and regeneration.

42

## 43 **Data Description**

### 44 **Context**

45 Echinoderms are marine animals characterized by the following three remarkable  
46 characteristics: 1) extensive regenerative abilities in both adult and larval forms [1, 2], 2) the  
47 water vascular system used for gas, nutrient and waste exchange [3], and 3) extraordinary  
48 morphological characteristics including pentaradial symmetry [4, 5].

49 Pentaradial symmetry has been observed in all extant classes of echinoderm. Echinoids (sea  
50 urchin) and holothurians (sea cucumber) always have five ambulacral grooves, and crinoids  
51 have many arms in multiples of five that branch out from the five primary brachia [4, 5]. Most  
52 species of asteroids and ophiuroids are five-armed, but many exceptions are scattered across  
53 the tree of Echinodermata. Extant asteroids are distinguished by 34 families, including 20  
54 families of only five-armed species, nine families of both five-armed and multi-armed species,  
55 and five families with exclusively multi-armed species [6]. However, most multi-armed forms  
56 have arm numbers that cannot be divided into five, raising questions about the arm  
57 development mechanisms that do not follow the pentaradial symmetry.

58 The octopus starfish, *Plazaster borealis* (NCBI:txid466999;  
59 marinespecies.org:taxname:254846), is a starfish that inhabits the water that surround Korea  
60 and Japan [7, 8]. It belongs to the family *Labidiasteridae*, one of five exclusively multi-armed  
61 families [6]. Figure 1A illustrates a unique morphology of *P. borealis* that the number of arms  
62 is around 31~40, which is a large number among multi-armed starfishes, and it shows a clear  
63 differentiation between arms and central disks [9].

64 In the previous study of *P. borealis*, Matsuoka et al. investigated the molecular phylogenetic  
65 relationship of five species from the order Forcipulatida: *Asterias amurensis*, *Aphelasterias*  
66 *japonica*, *Distolasterias nipon*, *Coscinasterias acutispina*, and *Plazaster borealis* [10]. *P.*  
67 *borealis* was the most closely related with five armed *A. amurensis* and distantly related with  
68 multi-armed *C. acutispina*. The result suggested that the unique morphology of *P. borealis*  
69 might have descended from a five-armed starfish, which possibly resulted from accelerated  
70 sequence evolution. However, the absence of a reference genome has limited in-depth research.  
71 To understand the genetic basis of the specialized morphology of the starfish, we sequenced  
72 the genome of *P. borealis* and performed comparative genomic analyses with the high-quality

73 of well-annotated genome sequences of six other echinoderms (*Asterias rubens*, *Acanthaster*  
74 *planci*, *Patiria miniata*, *Lytechinus variegatus*, *Parastichopus parvimensis*, and  
75 *Strongylocentrotus purpuratus*).

76

### 77 **Chromosome-level genome assembly of the octopus starfish**

78 We estimated the genome size of *P. borealis* with GenomeScope[40] to be ~497Mb  
79 (Supplementary Figure 1). A comprehensive sequencing data set was generated for the *P.*  
80 *borealis* genome assembly based on this estimation. From the Nanopore sequencing platform,  
81 a total of 57.76 Gb long read was yielded with 116x coverage. Using the Illumina sequencing  
82 platform, 142x coverage of Illumina short paired-end read sequencing data and 115x coverage  
83 of Hi-C paired-end reads were generated (Supplementary Table 1). Moreover, we sequenced  
84 25.63 Gb of RNA Illumina short paired-end reads and 7.28 Gb of RNA Nanopore long reads  
85 to construct transcriptome assembly utilized for annotation.

86 A draft genome assembly was generated, consisting of 179 contigs totaling 561Mb with an  
87 N50 of 11Mb (Supplementary Table 2). We then scaffolded the contigs using Hi-C data with  
88 3D-DNA to obtain chromosomal information [11]. The total size of the final assembly was  
89 561Mb comprising 22 chromosome-level scaffolds with a contig N50 of 24Mb. These 22  
90 chromosome-level scaffolds comprise 92.48% of the assembly, although the remaining 42 Mb  
91 were unanchored and required further investigation (Table 1, Supplementary Figure 2). This  
92 number is consistent with chromosome results of other species of the order Forcipulatida,  
93 supporting the accurate chromosome number acquired in the current study.

94

95

96 **Table 1:** *Plazaster borealis* assembly statistics

| Assembly statistics                  | Value          |
|--------------------------------------|----------------|
| Genome size (bp)                     | 561,050,340    |
| Number of scaffolds                  | 801            |
| Number of chromosome-scale scaffolds | 22             |
| N50 of scaffolds (bp)                | 24,975,817     |
| L50 of scaffolds                     | 10             |
| Chromosome-scale scaffolds (bp)      | 518,884,334    |
| GC content of the genome (%)         | 38.89          |
| QV score                             | 36.3457        |
| Error rate                           | 0.00023        |
| BUSCO analysis                       |                |
| Library                              | Metazoan_odb10 |
| Complete                             | 935 (98.0%)    |
| Complete and single-copy             | 925 (97.0%)    |
| Complete and duplicated              | 10 (1.0%)      |
| Fragmented                           | 11 (1.2%)      |
| Missing                              | 8 (0.8%)       |

97

98 **Completeness of the assembled genome**

99 The genome completeness was evaluated using BUSCO [12] with the metazoan dataset called  
100 ‘metazoan\_odb10’. As a result, total of 935 (98.0%) core metazoan genes were successfully  
101 detected in the genome, consisting of 97.0% single-copy, 1.0% duplicated, 1.2% fragmental,  
102 and 0.8% missing genes from the metazoan dataset. We also estimated the overall assembly  
103 quality by comparing the k-mer distribution of the assemblies and the Illumina short-read sets  
104 using Merqury [13]. The genome assembly of *P. borealis* showed high-quality values (QV >  
105 36) with an error rate of 0.00023 (Table 1). Additionally, the GC content of *P. borealis* was  
106 38.89%, which was very similar to that of *A. rubens* (38.76%) and *P. ochraceus* (39.01%), the  
107 species of the order Forcipulatida. The assessment results validated the high quality of our final  
108 genome assembly. To our knowledge, this is the first high-quality chromosome level genome  
109 assembly for *P. borealis* and the first reference genome of the family *Labidiasteridae*.



110

111 **Annotation of repeats and genes**

112 Repetitive elements accounted for 51.05% of the whole genome assembly, and detailed  
 113 percentages of the predominant repetitive element families are summarized in Table 2. We  
 114 annotated a total of 26,836 genes onto the assembled regions. Compared with other starfish, *P.*  
 115 *borealis* has a similar average exon length (213 bp) and exon number per gene (7.19), but it  
 116 has a shorter intron length (1,261 bp) than *A. rubens* (eAstRub1.3). BUSCO benchmarking  
 117 value of this gene set was summarized as 92.6% of complete genes, including 90% single-copy,  
 118 2.6% duplicated, 4.6% fragmental, and 2.8% missing genes from the metazoan dataset.  
 119 Following a standard functional annotation, we observed that 24,248 (96.13%) genes were  
 120 successfully annotated with at least one related functional assignment (Table 3).

121

122 **Table 2:** *Plazaster borealis* repetitive DNA elements

| Type           | Number of elements | Length occupied (bp) | Percentage of sequence (%) |
|----------------|--------------------|----------------------|----------------------------|
| DNA            | 10,734             | 3,597,965            | 0.64                       |
| LINE           | 42,851             | 3,472,043            | 0.62                       |
| SINE           | 60,394             | 13,931,402           | 2.48                       |
| LTR            | 8,277              | 5,145,127            | 0.92                       |
| Satellite      | 9                  | 2,752                | 0                          |
| Small RNA      | 20,889             | 1,464,546            | 0.26                       |
| Simple repeat  | 162,149            | 8,016,020            | 1.43                       |
| Unclassified   | 1,294,477          | 249,314,223          | 44.44                      |
| Low complexity | 25,170             | 1,365,485            | 0.24                       |
| Total          |                    |                      | 51.05%                     |

123

124

125 **Table 3:** *Plazaster borealis* genome annotation statistics

| Statistic                                | Value       |
|------------------------------------------|-------------|
| Number of predicted genes                | 26,836      |
| Number of predicted protein-coding genes | 25,224      |
| Average gene length                      | 8,948.89    |
| Number of transcripts                    | 26,737      |
| Average transcript length (bp)           | 1,502.90    |
| Number of exons                          | 192,343     |
| Average exon length (bp)                 | 213.57      |
| Average exon per transcript              | 7.19        |
| Number of introns                        | 165,606     |
| Average intron length (bp)               | 1,261.88    |
| Number of genes annotated to Swiss-Prot  | 18,451      |
| Number of genes annotated to PFAM        | 18,541      |
| Number of genes annotated to NR          | 24,229      |
| BUSCO analysis                           |             |
| Complete (%)                             | 884 (92.6%) |
| Complete and single-copy (%)             | 859 (90.0%) |
| Complete and duplicated (%)              | 25 (2.6%)   |
| Fragmented (%)                           | 44 (4.6%)   |
| Missing (%)                              | 26 (2.8%)   |

126

127 **Phylogenetic and syntenic relationship**

128 To understand the phylogenetic placement of *P. borealis*, species tree was inferred from sets of  
 129 multi-copy gene trees with STAG algorithm [75] based on protein sequences from seven  
 130 echinoderm genomes: *Asterias rubens*, *Acanthaster planci*, *Patiria miniata*, *Lytechinus*  
 131 *variegatus*, *Parastichopus parvimensis*, and *Strongylocentrotus purpuratus*. *P. borealis* was the  
 132 most closely related to *A. rubens* (Figure 2), consistent with both previous results [10].

133 Syntenic relationships as inferred by MCscan [14] results were congruent with the phylogenetic  
 134 results from the STAG analyses. In the genome of *P. borealis* and *A. rubens*, every chromosome  
 135 matched each other well enough to suggest that the entire chromosomes seem to be highly

136 conserved, except an additional genomic region detected in chromosome 7 of *P. borealis*  
137 (Figure 3A, 3B). A similar tendency, using Chromeister [15], was observed with other species  
138 of the order Forcipulatida, *P. ochraceus* and *M. glacialis*. *P. borealis* exhibited more  
139 conservation of synteny with *P. ochraceus* than *A. rubens*, which seems to be influenced by the  
140 observed genomic region. We also analyzed synteny of *P. borealis* with *A. planci*, the starfish  
141 of a different order; however, chromosomes were not matched. These results suggest that  
142 genomes within the Forcipulatida order are remarkably conserved in terms of synteny, allowing  
143 us to confirm the high quality of our genome assembly.

144

#### 145 **Gene family evolution in *P. borealis***

146 Based on the assumption that the unique morphology of *P. borealis* is explained by accelerated  
147 evolutionary rate [10], we performed comparative genomic analyses among seven echinoderm  
148 species. Although the genetic mechanism underlying the development of supernumerary arms  
149 of starfish is elusive, we hypothesized that genes associated with tissue morphogenesis are  
150 increased to produce excessive arms. We tested this hypothesis by performing expansion and  
151 contraction analyses of gene families using CAFE5 [16]. Compared with six echinoderm  
152 species, 286 gene families were expanded, whereas 2,072 gene families were contracted in *P.*  
153 *borealis* (Figure 2). The significantly expanded genes in the genome of *P. borealis* were  
154 significantly enriched in categories of Notch and BMP signaling pathway, body pattern  
155 specification, morphogenesis, and eye development (P-value<0.02) (Figure 4). Collectively,  
156 these expanded gene families are likely to play an enhanced role in forming supernumerary  
157 arms of *P. borealis*. Notch and BMP signaling are evolutionally conserved and play multiple  
158 roles during animal development, especially in regulating body patterns. The Notch signaling  
159 pathway is essential for cell proliferation, cell fate decisions, and induction of differentiation

160 **Table 4:** Genes with accelerated evolution in the *P. borealis*.

| Gene      | H0_lnl   | H1_lnl   | Likelihood ratio | FDR      | # of positively selected sites* |
|-----------|----------|----------|------------------|----------|---------------------------------|
| GPR161    | -8827.28 | -8798.95 | 56.66761         | 2.06E-13 | 5                               |
| RPL5      | -3991.54 | -3968.12 | 46.84587         | 2.3E-11  | 1                               |
| RSL24D1   | -2215.1  | -2192.93 | 44.35075         | 6.59E-11 | 14                              |
| PHB2      | -4815.8  | -4805.98 | 19.631658        | 1.61E-05 | 4                               |
| NAA10     | -4703.42 | -4694.3  | 18.237898        | 2.92E-05 | 4                               |
| IQCA1     | -9112.13 | -9103.79 | 16.684644        | 5.88E-05 | 2                               |
| SLC30A5   | -10574.5 | -10566.6 | 15.766218        | 8.6E-05  | 3                               |
| BMP10     | -8017.18 | -8010.17 | 14.034764        | 0.000196 | 4                               |
| STOML2    | -5414.16 | -5408.06 | 12.206464        | 0.000476 | 1                               |
| ACYP1     | -1855.62 | -1849.54 | 12.153438        | 0.000452 | 3                               |
| NIPSNAP3A | -4951.12 | -4946.47 | 9.296206         | 0.001968 | 1                               |

161 H0\_lnl: log likelihood given H0 ( $\omega$  does not vary across the branches), H1\_lnl: log likelihood  
 162 given H1, \*Number of positively selected sites with a BEB of > 0.95.

163

164 during embryonic and postnatal development [17-19]. Besides regulating cell-fate decisions at  
 165 an individual cell level, a cell-to-cell signaling mechanism of Notch coordinates the  
 166 spatiotemporal patterning in a tissue [20]. In *Drosophila melanogaster*, Notch functions as it is  
 167 required to specify the fate of the cells that will eventually segment leg and develop leg joint  
 168 [21, 22]. The mechanisms of BMP gradient formation have been studied in various animals.  
 169 BMP2/4 signaling study of sea urchin showed that interaction between BMP2/4 and chordin  
 170 formed the dorsal-ventral gradient and resulted in dorsal-ventral axis patterning [23].  
 171 Furthermore, as the physical characteristic of starfish, their eyes exist at the end of each arm  
 172 denoting that the arm development is accompanied with the eye development. However,  
 173 contracted gene families of *P. borealis* had no significantly enriched functions, except GTPase  
 174 regulator activity (GO:0030695, P-value=0.005647). Gene repertoires of *P. borealis* showed

175 differences in the contents of other species' expanded and contracted genes mainly enriched in  
176 terms related to the nerve development (Supplementary Table 3).

177 In addition, we identified 607 gene families unique in *P. borealis* consisting of 2,631 genes and  
178 111 one-to-one orthologous genes between *P. borealis* and six other species. The gene families  
179 unique in *P. borealis* are enriched for the following gene ontology (GO) terms: apoptotic cell  
180 clearance, positive regulation of epithelial cell proliferation, vascular transport, and activation  
181 of JNKK activity (Supplementary Table 4). The enriched term, activation of JNKK activity, is  
182 involved in the JNK pathway, which promotes apoptosis by upregulating pro-apoptotic gene  
183 expression [24]. Typically, cell proliferation and death are important to achieve tissue formation,  
184 involving changes in cell number, size, shape, and position [25]. Based on these findings, the  
185 presence of additional genes of the Notch pathway, BMP pathway, and JNK pathway involved  
186 in body pattern specification, cell proliferation, and apoptosis could indicate enhanced tissue  
187 shaping to form many arms.

188 The signaling pathways that underwent gene family expansion in the *P. borealis* lineage,  
189 especially the Notch and BMP pathways, also play several key conserved roles in the  
190 regeneration of many species. For example, in the study of brittle stars, the inhibition of Notch  
191 signaling hindered arm regeneration and downregulated genes related to ECM component, cell  
192 proliferation, apoptosis, and innate immunity, which are biological processes associated with  
193 regeneration [26]. In addition, previous studies of echinoderm gene expression and other  
194 animals showed that Notch and BMP signaling are the principal pathways for tissue  
195 regeneration [27, 28].

196 The studies of the metamorphosis of multi-armed starfishes led to the proposal of the 'Five-  
197 Plus' hypothesis [6, 29]. It states that five primary arms generated concurrently develop in a  
198 controlled unit and supernumerary arms are produced in the separate and independent pathways.

199 Although these pathways are still uncertain, Hotchkiss suggested two possibilities: post-  
200 generation of arms in the incompletely developed starfish or intercalated regeneration of arms  
201 in adults [6]. The capacity of regeneration is a remarkable feature of all extant classes of  
202 echinoderms [2]. Thus, it is possible that multi-armed starfishes could transform from five-  
203 rayed forms to multi-rayed forms by growing new arms through regeneration-related  
204 mechanisms. Thus, suggesting that genes in these families may play critical roles in the  
205 biosynthesis and metabolism processes of its unique body plan as well as in regeneration  
206 processes.

207 Using *P. borealis* as the foreground branch and six other echinoderm species as the background  
208 branches, we incorporated the branch-site model in the PAML package to detect positively  
209 selected genes. A total of 14 genes were positively selected in *P. borealis* (P-value < 0.05, BEB  
210 > 0.95) and significantly enriched in GO terms related to “lipid metabolism,” “transport of  
211 proton,” “pyruvate metabolism,” and “Hedgehog signaling pathway” (Figure 5, Supplementary  
212 Table 5). It is worth noting that these positively selected genes also included BMP4, which  
213 regulates regeneration and tissue specification (Table 4).

214 Regeneration is a high-energy-required process in which starfishes in the regeneration state  
215 increase the amount of lipid and energy in the pyloric caeca to use [30]. GPR161 and BMP4,  
216 well-known genes to be critical in regeneration, were also detected as positively selected genes.  
217 The G-protein coupled receptor Gpr161 negatively regulates the Hedgehog pathway via cAMP  
218 signaling, known to participate in the process of tissue regeneration[31, 32]. Additionally,  
219 previous studies of planarian regeneration indicate that BMP4 is a key for tissue specification,  
220 especially dorsal-ventral polarity, which may explain the distinctive disk of *P. borealis* [33].  
221 Together with those of previous studies, our results further suggest that related genes may have  
222 contributed to the regeneration and development of the unique body plan of *P. borealis*,

223 multiple arms. Therefore, *P. borealis* can be potentially regarded as a valuable model to  
224 investigate the mechanisms underlying supernumerary arm development and regeneration.  
225 This high-quality genome is useful and valuable genetic resource for future research, especially  
226 in a unique body plan and regeneration biology.

227

## 228 **Conclusion**

229 The first chromosome-level *P. borealis* genome was assembled and annotated. Twenty-two  
230 chromosomal scaffolds are constructed with N50 of 24.97 Mb, which showed high  
231 conservation with genomes of three starfish species of the order Forcipulatida. Furthermore,  
232 we identified the accelerated evolution of *P. borealis* in the context of genomics, which may  
233 explain its multi-armed morphology and regenerative capacity. The availability of the high-  
234 quality genome sequence of *P. borealis* is expected to provide many insights into the unique  
235 morphology of multi-armed starfish and their regeneration. Regarding the scientific value of *P.*  
236 *borealis*, the genome and gene inventory resulting from this study will be helpful in future  
237 research on these critical topics.

238

## 239 **Methods**

### 240 **Sampling and genomic DNA extraction**

241 Adult specimens of *P. borealis* were sampled at a depth of 31 meters near Ulleung island, Korea  
242 (latitude: 37.53390, longitude: 130.93920) (Figure 1A). *P. borealis* was dissected with scissors  
243 to obtain gonad, pyloric caecae, stomach, and epidermis of an arm. Isolated tissues were frozen  
244 on dry ice immediately and kept at -80°C until further processing. Then, the frozen tissues were  
245 ground into a fine powder with liquid nitrogen using a pestle and mortar for the nucleic acid

246 extraction.

247 High molecular weight (HMW) DNA was obtained from gonad following a nuclei isolation  
248 method [34]. Genomic DNA was obtained from gonad following modified CTAB protocol [35]  
249 in the presence of 2% PVP (1% of MW 10,000 and 1% of MW 40,000) PolyVinylPyrrolidone  
250 (Sigma-Aldrich, Burlington, MA, USA). DNA concentration was determined using the Quant-  
251 iT PicoGreen® assay (Invitrogen, Waltham, MA, USA) and the absorbance at 260 nm and  
252 230nm (A260/A230) was measured in the Synergy HTX Multi-Mode microplate reader  
253 (Biotek, Rochester, VT, USA). Their quality verified by gel electrophoresis.

#### 254 **High-throughput sequencing of genomic DNA**

255 For Nanopore sequencing, short genomic fragments (<10 kb) were removed using a Short Read  
256 Eliminator Kit (Circulomics, Baltimore, MD, USA). The library was prepared using the ONT  
257 1D ligation Sequencing kit (SQK-LSK109, Oxford Nanopore Technologies, Oxford, UK) with  
258 the native barcoding expansion kit (EXP-NBD104) in accordance with the manufacturer's  
259 protocol. In brief, genomic DNA was repaired using the NEBNext FFPE DNA Repair Mix  
260 (New England BioLabs, Ipswich, MA, USA) and NEBNext Ultra II End Repair/dA-Tailing  
261 Module. The end-prepped DNA was individually barcoded with ONT native barcode by NEB  
262 Blunt/TA Ligase Master Mix (New England BioLabs). Barcoded DNA samples were pooled in  
263 equal molar amounts. It was ligated with adapter using the NEBNext Quick Ligation Module  
264 (New England BioLabs). After every enzyme reaction, the DNA samples were purified using  
265 AMPure XP beads (Beckman Coulter, Brea, CA, USA). The final library was loaded onto  
266 MinION flow cell (FLO-MIN106 and FLO-MIN111, R9.4 and R10.3) (Oxford Nanopore  
267 Technologies) and PromethION flowcell(FLO-PRO002) (Oxford Nanopore Technologies).  
268 Sequencing was performed on a MinION MK1b and PromethION sequencer (PromethION,  
269 RRID:SCR\_017987) with MinKNOW software (19.10.1).



270 We also used an Illumina platform to generate short high-quality sequencing reads. DNA  
271 library was prepared using TruSeq DNA PCR-Free (Illumina, San Diego, CA, USA) and  
272 evaluated the distribution of fragment sizes with TapeStation D1000 (Agilent Technologies,  
273 Santa Clara, CA, USA). Finally, DNA library was sequenced in the Illumina NovaSeq 6000  
274 (Illumina) (Illumina NovaSeq 6000 Sequencing System, RRID:SCR\_016387) with the length  
275 of 150 bp paired-end reads.

276 Hi-C technology was also employed for chromosome-level genome assembly. Hi-C library  
277 construction protocol is as follows. Ground gonad tissue was mixed with 1% formaldehyde for  
278 fixing chromatin then the nuclei was isolated following a nuclei isolation method [1]. Fixed  
279 chromatin was digested with HindII-HF (New England BioLabs), the 5' overhangs filled in  
280 with nucleotides and biotin-14-dCTP(Invitrogen) and ligated free blunt ends. After ligation,  
281 the DNA purified and removed biotin from un-Ligated DNA ends. Fragmentation and size  
282 selection was performed to shear the Hi-C DNA. Hi-C Library preparation is performed using  
283 ThruPLEX® DNA-seq Kit (Takara Bio USA, Inc, Mountain View, CA, USA). HI-C library  
284 was evaluated the distribution of fragment sizes with TapeStation D1000 (Agilent Technologies,  
285 Santa Clara, CA, USA). HI-C library was sequenced in the Illumina NovaSeq 6000 (Illumina)  
286 with the length of 150 bp paired-end reads. All of the obtained reads were quality controlled  
287 by trimming adaptor sequences and low-quality reads using Trimmomatic v0.39 [36] for  
288 Illumina reads and Porechop v0.2.4 [37] (-q 7) and NanoFilt [38] (-k 5000) for Nanopore reads.

### 289 **Genome size estimation**

290 The quality controlled Illumina sequencing data was used for the calculation of the genome  
291 size. Using the reads, a k-mer map was constructed to evaluate genome size, unique sequence  
292 ratio, and heterozygosity. For this, jellyfish v2.3.0 (Jellyfish, RRID:SCR\_005491) [39] was  
293 first used to compute the distribution of the 21-mer frequencies. The final 21-mer count

294 distribution per genome was used within the GenomeScope 2.0 [40].

### 295 **Genome assembly and scaffolding with Hi-C data**

296 Multiple approaches were tried but the best assembly was obtained in combination of  
297 NextDenovo [41], NextPolish [42] and 3D-DNA [11]. We utilized NextDenovo v2.4.0 to  
298 assemble the *P. borealis* genome using only the Nanopore long reads. After the assembly, we  
299 applied the Illumina short reads to polish the assembled contigs by operating NextPolish v1.1.0.  
300 All software parameter setting were default.

301 To obtain a chromosome-level genome assembly of *P. borealis*, we employed the Hi-C  
302 technology to scaffold assembled contigs. Detailed procedures are as follows. (i) The paired-  
303 end Illumina reads were mapped onto the polished assembly using HiC-Pro v3.0.0 (HiC-Pro,  
304 RRID:SCR\_017643) [43] with default parameters to check the quality of the raw Hi-C reads.  
305 (ii) Juicer v1.6 (Juicer, RRID:SCR\_017226) [44] and 3D-DNA v180419 [11] were applied to  
306 cluster the genomic contig sequences into potential chromosomal groups. (iii) Juicebox  
307 v1.13.01 (Juicebox, RRID:SCR\_021172) [45] was used to validate the contig orientation and  
308 to remove ambiguous fragments with the assistance of manual correction.

### 309 **Assessment of the chromosome-level genome assembly**

310 Two routine methods were employed to assess the completeness of our finally assembled  
311 genome as follows. (i) Benchmarking Universal Single-Copy Orthologues (BUSCO) v5.2.2  
312 (BUSCO, RRID:SCR\_015008) [12] assessment: The metazoan\_odb10 and eukaryotic\_odb10  
313 orthologues were used as the BUSCO reference. (ii) QV score and error rate was estimated  
314 with Merqury v1.3 [13].

### 315 **RNA extraction and sequencing**

316 Total RNA was isolated using TRIzol Reagent(Invitrogen) from three tissues of same *P.*

317 *borealis*, digestive gland, stomach and epidermis of arm following the manufacturer's protocol.  
318 Total RNA concentration was determined using the Quant-iT™ RNA Assay Kits (Invitrogen)  
319 and the absorbance at 260 nm and 280 nm (A260/A280) was measured in the Synergy HTX  
320 Multi-Mode microplate reader (Biotek). Their quality verified by gel electrophoresis. mRNA  
321 was isolated using Magnosphere™ UltraPure mRNA purification kit(Takara) according to the  
322 manufacturer's instructions.

323 cDNA library was prepared using cDNA-PCR Sequencing Kit (SQK-PCS109, Oxford  
324 Nanopore Technologies) with the PCR Barcoding Kit (SQK-PBK004, Oxford Nanopore  
325 Technologies) in accordance with the manufacturer's protocol. In brief, RT and strand-  
326 switching primers were provided by ONT with the SQK-PCS109 kit. Following RT, PCR  
327 amplification was performed using the LongAmpTaq 2X Master Mix (New England Biolabs)  
328 and AMPure XP beads (Beckman Coulter) were used for DNA purification. The PCR product  
329 was then subjected to ONT adaptor ligation using the SQK-PBK004. The final library was  
330 loaded onto MinION flow cell (FLO-MIN106 and FLO-MIN111, R9.4 and R10.3) (Oxford  
331 Nanopore Technologies) and sequencing was performed on a MinION MK1b and MinKNOW  
332 software (19.10.1).

333 We also used an Illumina platform to generate short high-quality sequencing reads. Using  
334 Truseq Stranded mRNA Prep kit, we constructed cDNA library. After evaluating the  
335 distribution of fragment sizes with BioAnalyzer 2100 (Agilent Technologies, Santa Clara, CA,  
336 USA), it was sequenced in the Illumina NovaSeq 6000 (Illumina, San Diego, CA, USA) with  
337 the length of 100 bp paired-end reads.

### 338 **Hybrid assembly of transcriptome**

339 To assemble transcriptome, we selected hybrid approach to restore more known genes and  
340 discover alternatively spliced isoforms, which can be useful in transcriptome analysis of

341 previously unsequenced organism. Therefore, long reads and short reads from three tissues  
342 were used for assembly. To ensure the accuracy of subsequent analyses, we trimmed the raw  
343 reads to remove adaptor sequences and low-quality reads. Trimmomatic v0.39 (Trimmomatic,  
344 RRID:SCR\_011848) and Porechop v0.2.4 (Porechop, RRID:SCR\_016967) were used to trim  
345 reads for Illumina and Nanopore reads, respectively. Subsequently, the clean reads were  
346 assembled using rnaSPAdes v3.14.1 (rnaSPAdes, RRID:SCR\_016992) [46] with default  
347 parameters and open reading frames with at least 100 amino acids were extracted from  
348 transcripts using TransDecoder (TransDecoder, RRID:SCR\_017647) [47].

### 349 **Annotation of repetitive elements**

350 Repetitive elements in the final assembly were annotated using the following two different  
351 strategies, (i) de novo annotation: RepeatModeler v2.0.1 (RepeatModeler, RRID:SCR\_015027)  
352 [48] and LTR\_Finder v2.0.1 (LTR\_Finder, RRID:SCR\_015247) [49] were used to build a local  
353 repeat reference. Subsequently, the genome assembly was aligned with this reference to  
354 annotate the de novo predicted repeat elements using RepeatMasker v4.1.1 (RepeatMasker,  
355 RRID:SCR\_012954) [50]. (ii) Homology annotation: Our genome assembly was searched in  
356 the RepBase (RepeatMaskerEdition) [51] using RepeatMasker v4.1.1. Finally, these data from  
357 the two strategies were integrated to generate a nonredundant data set of repetitive elements in  
358 the final *P. borealis* genome assembly.

### 359 **Gene prediction and function annotation**

360 Three methods were used to predict the *P. borealis* gene set from the soft masked *P. borealis*  
361 genome. (i) ab initio gene prediction: Augustus v3.4.0 (Augustus, RRID:SCR\_008417) [52,  
362 53], GeneMark-ET v3.62 [54], Braker v2.1.5 (BRAKER, RRID:SCR\_018964) [55-59] and  
363 SNAP v2.51.7 [60] were employed to annotate gene models. (ii) Evidence-based gene  
364 prediction: Exonerate (Exonerate, RRID:SCR\_016088) [61] were utilized to annotate gene

365 models with expressed sequence tag (EST) and protein homology dataset. Assembled  
366 transcriptome of *P. borealis* were used for EST dataset and protein sequences of *A. rubens*  
367 (GCF\_902459465.1) from NCBI were used for protein homology dataset. (iii) Consensus gene  
368 prediction: EVidenceModeler (EVidenceModeler, RRID:SCR\_014659) [62] (EVM) combined  
369 predicted ab initio gene models and evidence based gene models into weighed consensus gene  
370 structures. This predicted gene set was searched in three public functional databases, including  
371 NCBI Nr (nonredundant protein sequences), Swiss-Prot [63] and Pfam database [64] to identify  
372 the potential function and functional domains with BLATP v2.10.0+ [65] and Interproscan5  
373 [66].

#### 374 **Gene family expansion and contraction**

375 We downloaded the protein sets of 6 echinoderm species, *Asterias rubens* (GCF\_902459465.1),  
376 *Acanthaster planci* (GCF\_001949145.1), *Patiria miniata* (GCF\_015706575.1), *Lytechinus*  
377 *variegatus* (Lvar2.2), *Parastichopus parvimensis* (Pparv\_v1.0), and *Strongylocentrotus*  
378 *purpuratus* (GCF\_000002235.5) from NCBI and EchinoBase [67] to analyze phylogenetic tree  
379 and identify the one-to-one orthologous proteins within the 7 examined species through  
380 OrthoFinder v2.5.2 (OrthoFinder, RRID:SCR\_017118) [68]. Species tree from OrthoFinder  
381 was used to show phylogenetic relationship. Regarding the tree, we used CAFE5 (CAFE,  
382 RRID:SCR\_005983) [16] to detect gene family expansion and contraction in the assembled *P.*  
383 *borealis* genome with default parameters. GO enrichment using EnrichGO (clusterProfiler  
384 v4.0.4) [69] was derived with the Fisher's exact test and chi-square test and then adjusted using  
385 the Benjamini-Hochberg procedure.

#### 386 **Genes under positive selection**

387 Positively selected genes in the *P. borealis* genome were detected from one-to-one orthologous  
388 genes, in which the *P. borealis* was used as the foreground branch, and the *A. rubens*, *A. planci*,

389 *P. miniata*, *L. variegatus*, *P. parvimensis* and *S. purpuratus* were used as the background  
390 branches. To detect positively selected genes, we used BLASTP v2.10.0+ (BLASTP,  
391 RRID:SCR\_001010) to screen out 115 one-to-one orthologous genes among 7 species. The  
392 multiple alignment was performed by the GUIDANCE v2.02 software (--msaProgram  
393 CLUSTALW, --seqType aa) [70-72] and PAL2NAL v14 [73] was applied to convert protein  
394 sequence alignments into the corresponding codon alignments. The branch-site model A  
395 incorporated in the PAML package (v4.9j) [74] was employed to detect positively selected  
396 genes. The null model used in the branch-site test (model = 2, NSsites =2, fix\_omega = 1,  
397 omega = 1) assumed that the comparison of the substitution rates at nonsynonymous and  
398 synonymous sites (Ka/Ks ratio) for all codons in all branches must be  $\leq 1$ , whereas the  
399 alternative model (model = 2, NSsites =2, fix\_omega = 0) assumed that the foreground branch  
400 included codons evolving at  $Ka/Ks > 1$ . A maximum likelihood ratio test was used to compare  
401 the two models. P-values were calculated through the chi-square distribution with 1 degree of  
402 freedom (df=1). The P-values were then adjusted for multiple testing using the false discovery  
403 rate (FDR) method. Genes were identified as positively selected when the  $FDR < 0.05$ .  
404 Furthermore, we required that at least one amino-acid site possessed a high probability of being  
405 positively selected (Bayes probability  $> 95\%$ ). If none of the amino acids passed this cutoff in  
406 the positively selected gene, then these genes were identified as false positives and excluded.  
407 GO enrichment using EnrichGO (clusterProfiler v4.0.4) [69] was derived with the Fisher's  
408 exact test and chi-square test and then adjusted using the Benjamini-Hochberg procedure with  
409 a cutoff set at  $P\text{-value} < 0.05$ .

410

411 **Data availability**

412 The final genome assembly and raw data from the Nanopore, Illumina and Hi-C libraries have  
413 been deposited at NCBI under BioProject PRJNA776097. Other supporting datasets are  
414 available in the *GigaScience* database GigaDB [76].

415

## 416 **Abbreviations**

417 BUSCO: Benchmarking Universal Single-Copy Orthologs; BLAST: Basic Local Alignment  
418 Search Tool; bp: base pairs; Gb: Giga base pairs; Mb: Mega base pairs; GC: guanine-cytosine;  
419 QV: Quality Value; LTR: long terminal repeat; LINE: Long Interspersed Nuclear Elements;  
420 SINE: Short Interspersed Nuclear Elements; NR: NCBI's non-redundant database; FDR: False  
421 Discovery Rate; GO: Gene Ontology; Bayes empirical Bayes; ONT: Oxford Nanopore  
422 Technologies; NCBI: National Center for Biotechnology Information;

423

## 424 **Additional Files**

425 Supplementary Figure S1. Genome size estimation

426 Supplementary Figure S2. *Plazaster borealis* genome assembly completeness. (A) Hi-C  
427 interactions among 22 chromosomes. (B) Cumulative length of assembly contained within  
428 scaffolds.

429 Supplementary Table S1. Statistics of raw sequencing data

430 Supplementary Table S2. Statistics of *Plazaster borealis* genome assembly before scaffolding.

431 Supplementary Table S3. GO and KEGG enrichment analysis of expanded and contracted gene  
432 families of seven echinoderm species.

433 Supplementary Table S4. GO and KEGG enrichment analysis of *Plazaster borealis* specific  
434 orthologs.

435 Supplementary Table S5. GO and KEGG enrichment analysis of positively selected genes.

#### 436 **Competing Interests**

437 The authors declare that they have no competing interests.

#### 438 **Funding**

439 This work was supported by a grant from the National Institute of Biological Resources (NIBR),  
440 funded by the Ministry of Environment (MOE) of the Republic of Korea (NIBR201930201).

441 Ministry of Environment, National Institute of Biological Resources, NIBR201930201, J Yu;

#### 442 **Authors' Contribution**

443 J.Y., J.P., and S.K. conceived the project; C.B. collected the sample; B.G. performed laboratory  
444 experiments; Y.L. and B.K. constructed the assembly; Y.L. annotated the assembly; Y.L. and  
445 J.J. performed comparative genome analysis; and Y.L., B.G and S.J. wrote the manuscript with  
446 input from all authors.

#### 447 **Acknowledgements**

448 We thank the reviewers for their helpful comments and constructive suggestions on the  
449 manuscript. We also appreciate to the NIBR for the support.

#### 450 **References**

- 451 1. Garcia-Arraras JE and Dolmatov IY. Echinoderms: potential model systems for studies on  
452 muscle regeneration. *Curr Pharm Des.* 2010;16 8:942-55. doi:10.2174/138161210790883426.
- 453 2. Carnevali, M. C. (2006). Regeneration in Echinoderms: repair, regrowth, cloning. *Invertebrate*  
454 *Survival Journal*, 3(1), 64-76.
- 455 3. Sprinkle J. Patterns and problems in echinoderm evolution. *Echinoderm Studies.* CRC Press;



- 456 2020. p. 1-18.
- 457 4. Nichols D. Pentamerism and the Calcite Skeleton in Echinoderms. *Nature*. 1967;215  
458 5101:665-6. doi:10.1038/215665a0.
- 459 5. Stephenson DG. Pentamerism and the Calcite Skeleton in Echinoderms. *Nature*. 1967;216 5119:994-  
460 doi:10.1038/216994a0.
- 461 6. Hotchkiss FHC. On the Number of Rays in Starfish1. *American Zoologist*. 2015;40 3:340-54.  
462 doi:10.1093/icb/40.3.340.
- 463 7. Sook S. A Systematic Study on the Asteroidea in the East Sea, Korea. *Animal Systematics,  
464 Evolution and Diversity*. 1995;11 2:243-63.
- 465 8. Uchida T. Report of the Biological Survey of Mutsu Bay. 11. Starfishes of Mutsu Bay. *Scientific  
466 Reports of Tohoku Imperial University*. 1928.
- 467 9. Hayashi R. Contributions to the Classification of the Sea-stars of Japan.: II. Forcipulata, with  
468 the Note on the Relationships between the Skeletal Structure and Respiratory Organs of the  
469 Sea-stars (With 11 Plates and 115 textfigures). *北海道帝國大學理學部紀要*. 1943;8 3:133-281.
- 470 10. Matsuoka N, Fukuda K, Yoshida K, Sugawara M and Inamori M. Biochemical systematics of  
471 five asteroids of the family Asteroidea based on allozyme variation. *Zoological science*.  
472 1994;11 2:p343-9.
- 473 11. Dudchenko O, Batra SS, Omer AD, Nyquist SK, Hoeger M, Durand NC, et al. De novo  
474 assembly of the *Aedes aegypti* genome using Hi-C yields chromosome-length scaffolds.  
475 *Science*. 2017;356 6333:92-5. doi:10.1126/science.aal3327.
- 476 12. Simao FA, Waterhouse RM, Ioannidis P, Kriventseva EV and Zdobnov EM. BUSCO: assessing  
477 genome assembly and annotation completeness with single-copy orthologs. *Bioinformatics*.  
478 2015;31 19:3210-2. doi:10.1093/bioinformatics/btv351.
- 479 13. Rhie A, Walenz BP, Koren S and Phillippy AM. Merqury: reference-free quality, completeness,  
480 and phasing assessment for genome assemblies. *Genome Biol*. 2020;21 1:245.  
481 doi:10.1186/s13059-020-02134-9.
- 482 14. Wang Y, Tang H, Debarry JD, Tan X, Li J, Wang X, et al. MCScanX: a toolkit for detection and  
483 evolutionary analysis of gene synteny and collinearity. *Nucleic Acids Res*. 2012;40 7:e49.  
484 doi:10.1093/nar/gkr1293.
- 485 15. Perez-Wohlfeil E, Diaz-Del-Pino S and Trelles O. Ultra-fast genome comparison for large-  
486 scale genomic experiments. *Sci Rep*. 2019;9 1:10274. doi:10.1038/s41598-019-46773-w.
- 487 16. Mendes FK, Vanderpool D, Fulton B and Hahn MW. CAFE 5 models variation in evolutionary  
488 rates among gene families. *Bioinformatics*. 2020; doi:10.1093/bioinformatics/btaa1022.
- 489 17. Artavanis-Tsakonas S, Rand MD and Lake RJ. Notch signaling: cell fate control and signal  
490 integration in development. *Science*. 1999;284 5415:770-6. doi:10.1126/science.284.5415.770.
- 491 18. Lai EC. Notch signaling: control of cell communication and cell fate. *Development*. 2004;131  
492 5:965-73. doi:10.1242/dev.01074.
- 493 19. Sato C, Zhao G and Ilagan MX. An overview of notch signaling in adult tissue renewal and  
494 maintenance. *Curr Alzheimer Res*. 2012;9 2:227-40. doi:10.2174/156720512799361600.

- 495 20. Bocci F, Onuchic JN and Jolly MK. Understanding the Principles of Pattern Formation Driven  
496 by Notch Signaling by Integrating Experiments and Theoretical Models. *Front Physiol.*  
497 2020;11:929. doi:10.3389/fphys.2020.00929.
- 498 21. de Celis JF, Tyler DM, de Celis J and Bray SJ. Notch signalling mediates segmentation of the  
499 *Drosophila leg.* *Development.* 1998;125 23:4617-26.
- 500 22. Cordoba S and Estella C. Role of Notch Signaling in Leg Development in *Drosophila*  
501 *melanogaster.* *Adv Exp Med Biol.* 2020;1218:103-27. doi:10.1007/978-3-030-34436-8\_7.
- 502 23. Lapraz F, Besnardeau L and Lepage T. Patterning of the Dorsal-Ventral Axis in Echinoderms:  
503 Insights into the Evolution of the BMP-Chordin Signaling Network. *PLOS Biology.* 2009;7  
504 11:e1000248. doi:10.1371/journal.pbio.1000248.
- 505 24. Dhanasekaran DN and Reddy EP. JNK signaling in apoptosis. *Oncogene.* 2008;27 48:6245-  
506 51. doi:10.1038/onc.2008.301.
- 507 25. Heisenberg CP and Bellaiche Y. Forces in tissue morphogenesis and patterning. *Cell.*  
508 2013;153 5:948-62. doi:10.1016/j.cell.2013.05.008.
- 509 26. Mashanov V, Akiona J, Khoury M, Ferrier J, Reid R, Machado DJ, et al. Active Notch signaling  
510 is required for arm regeneration in a brittle star. *PLoS One.* 2020;15 5:e0232981.  
511 doi:10.1371/journal.pone.0232981.
- 512 27. Reinardy HC, Emerson CE, Manley JM and Bodnar AG. Tissue regeneration and  
513 biomineralization in sea urchins: role of Notch signaling and presence of stem cell markers.  
514 *PLoS One.* 2015;10 8:e0133860. doi:10.1371/journal.pone.0133860.
- 515 28. Shao Y, Wang XB, Zhang JJ, Li ML, Wu SS, Ma XY, et al. Genome and single-cell RNA-  
516 sequencing of the earthworm *Eisenia andrei* identifies cellular mechanisms underlying  
517 regeneration. *Nat Commun.* 2020;11 1:2656. doi:10.1038/s41467-020-16454-8.
- 518 29. Frederick HCH. A "Rays-as-Appendages" Model for the Origin of Pentamerism in  
519 Echinoderms. *Paleobiology.* 1998;24 2:200-14.
- 520 30. Rubilar T, Villares G, Epherra L, Díaz-de-Vivar ME and Pastor-de-Ward CT. Fission,  
521 regeneration, gonad production and lipids storage in the pyloric caeca of the sea star  
522 *Allostichaster capensis.* *Journal of Experimental Marine Biology and Ecology.* 2011;409 1:247-  
523 52. doi:<https://doi.org/10.1016/j.jembe.2011.09.004>.
- 524 31. Warner JF, Miranda EL and McClay DR. Contribution of hedgehog signaling to the  
525 establishment of left-right asymmetry in the sea urchin. *Dev Biol.* 2016;411 2:314-24.  
526 doi:10.1016/j.ydbio.2016.02.008.
- 527 32. Mukhopadhyay S, Wen X, Ratti N, Loktev A, Rangell L, Scales SJ, et al. The ciliary G-protein-  
528 coupled receptor Gpr161 negatively regulates the Sonic hedgehog pathway via cAMP  
529 signaling. *Cell.* 2013;152 1-2:210-23. doi:10.1016/j.cell.2012.12.026.
- 530 33. Reddien PW. Constitutive gene expression and the specification of tissue identity in adult  
531 planarian biology. *Trends Genet.* 2011;27 7:277-85. doi:10.1016/j.tig.2011.04.004.
- 532 34. Zhang M, Zhang Y, Scheuring CF, Wu CC, Dong JJ and Zhang HB. Preparation of megabase-  
533 sized DNA from a variety of organisms using the nuclei method for advanced genomics

534 research. *Nat Protoc.* 2012;7 3:467-78. doi:10.1038/nprot.2011.455.

535 35. Porebski S, Bailey LG and Baum BR. Modification of a CTAB DNA extraction protocol for  
536 plants containing high polysaccharide and polyphenol components. *Plant Molecular Biology*  
537 *Reporter.* 1997;15 1:8-15. doi:10.1007/BF02772108.

538 36. Bolger AM, Lohse M and Usadel B. Trimmomatic: a flexible trimmer for Illumina sequence  
539 data. *Bioinformatics.* 2014;30 15:2114-20. doi:10.1093/bioinformatics/btu170.

540 37. Porechop. <https://github.com/rrwick/Porechop> (2017).

541 38. De Coster W, D'Hert S, Schultz DT, Cruts M and Van Broeckhoven C. NanoPack: visualizing  
542 and processing long-read sequencing data. *Bioinformatics.* 2018;34 15:2666-9.  
543 doi:10.1093/bioinformatics/bty149.

544 39. Marçais G and Kingsford C. A fast, lock-free approach for efficient parallel counting of  
545 occurrences of k-mers. *Bioinformatics.* 2011;27 6:764-70. doi:10.1093/bioinformatics/btr011.

546 40. Ranallo-Benavidez TR, Jaron KS and Schatz MC. GenomeScope 2.0 and Smudgeplot for  
547 reference-free profiling of polyploid genomes. *Nat Commun.* 2020;11 1:1432.  
548 doi:10.1038/s41467-020-14998-3.

549 41. NextOmics: NextDeNovo. <https://github.com/Nextomics/NextDenovo> (2019).

550 42. Hu J, Fan J, Sun Z and Liu S. NextPolish: a fast and efficient genome polishing tool for long-  
551 read assembly. *Bioinformatics.* 2020;36 7:2253-5. doi:10.1093/bioinformatics/btz891.

552 43. Servant N, Varoquaux N, Lajoie BR, Viara E, Chen CJ, Vert JP, et al. HiC-Pro: an optimized  
553 and flexible pipeline for Hi-C data processing. *Genome Biol.* 2015;16:259.  
554 doi:10.1186/s13059-015-0831-x.

555 44. Durand NC, Shamim MS, Machol I, Rao SS, Huntley MH, Lander ES, et al. Juicer Provides a  
556 One-Click System for Analyzing Loop-Resolution Hi-C Experiments. *Cell Syst.* 2016;3 1:95-8.  
557 doi:10.1016/j.cels.2016.07.002.

558 45. Durand NC, Robinson JT, Shamim MS, Machol I, Mesirov JP, Lander ES, et al. Juicebox  
559 Provides a Visualization System for Hi-C Contact Maps with Unlimited Zoom. *Cell Syst.*  
560 2016;3 1:99-101. doi:10.1016/j.cels.2015.07.012.

561 46. Bushmanova E, Antipov D, Lapidus A and Prjibelski AD. rnaSPAdes: a de novo transcriptome  
562 assembler and its application to RNA-Seq data. *Gigascience.* 2019;8 9  
563 doi:10.1093/gigascience/giz100.

564 47. TransDecoder. <https://github.com/TransDecoder/TransDecoder> (2015).

565 48. Flynn JM, Hubley R, Goubert C, Rosen J, Clark AG, Feschotte C, et al. RepeatModeler2 for  
566 automated genomic discovery of transposable element families. *Proc Natl Acad Sci U S A.*  
567 2020;117 17:9451-7. doi:10.1073/pnas.1921046117.

568 49. Xu Z and Wang H. LTR\_FINDER: an efficient tool for the prediction of full-length LTR  
569 retrotransposons. *Nucleic Acids Res.* 2007;35 Web Server issue:W265-8.  
570 doi:10.1093/nar/gkm286.

571 50. Smit A, Hubley, R & Green, P: RepeatMasker Open-4.0. <http://www.repeatmasker.org> (2013-  
572 2015).

- 573 51. Bao W, Kojima KK and Kohany O. Repbase Update, a database of repetitive elements in  
574 eukaryotic genomes. *Mob DNA*. 2015;6:11. doi:10.1186/s13100-015-0041-9.
- 575 52. Stanke M, Diekhans M, Baertsch R and Haussler D. Using native and syntenically mapped  
576 cDNA alignments to improve de novo gene finding. *Bioinformatics*. 2008;24 5:637-44.  
577 doi:10.1093/bioinformatics/btn013.
- 578 53. Stanke M, Schoffmann O, Morgenstern B and Waack S. Gene prediction in eukaryotes with  
579 a generalized hidden Markov model that uses hints from external sources. *BMC*  
580 *Bioinformatics*. 2006;7:62. doi:10.1186/1471-2105-7-62.
- 581 54. Lomsadze A, Burns PD and Borodovsky M. Integration of mapped RNA-Seq reads into  
582 automatic training of eukaryotic gene finding algorithm. *Nucleic Acids Res*. 2014;42 15:e119.  
583 doi:10.1093/nar/gku557.
- 584 55. Hoff KJ, Lange S, Lomsadze A, Borodovsky M and Stanke M. BRAKER1: Unsupervised RNA-  
585 Seq-Based Genome Annotation with GeneMark-ET and AUGUSTUS. *Bioinformatics*. 2016;32  
586 5:767-9. doi:10.1093/bioinformatics/btv661.
- 587 56. Hoff KJ, Lomsadze A, Borodovsky M and Stanke M. Whole-Genome Annotation with BRAKER.  
588 *Methods Mol Biol*. 2019;1962:65-95. doi:10.1007/978-1-4939-9173-0\_5.
- 589 57. Li H, Handsaker B, Wysoker A, Fennell T, Ruan J, Homer N, et al. The Sequence  
590 Alignment/Map format and SAMtools. *Bioinformatics*. 2009;25 16:2078-9.  
591 doi:10.1093/bioinformatics/btp352.
- 592 58. Barnett DW, Garrison EK, Quinlan AR, Stromberg MP and Marth GT. BamTools: a C++ API  
593 and toolkit for analyzing and managing BAM files. *Bioinformatics*. 2011;27 12:1691-2.  
594 doi:10.1093/bioinformatics/btr174.
- 595 59. Buchfink B, Xie C and Huson DH. Fast and sensitive protein alignment using DIAMOND. *Nat*  
596 *Methods*. 2015;12 1:59-60. doi:10.1038/nmeth.3176.
- 597 60. Leskovec J and Soscic R. SNAP: A General Purpose Network Analysis and Graph Mining  
598 Library. *ACM Trans Intell Syst Technol*. 2016;8 1 doi:10.1145/2898361.
- 599 61. Slater GS and Birney E. Automated generation of heuristics for biological sequence  
600 comparison. *BMC Bioinformatics*. 2005;6:31. doi:10.1186/1471-2105-6-31.
- 601 62. Haas BJ, Salzberg SL, Zhu W, Pertea M, Allen JE, Orvis J, et al. Automated eukaryotic gene  
602 structure annotation using EvidenceModeler and the Program to Assemble Spliced  
603 Alignments. *Genome Biol*. 2008;9 1:R7. doi:10.1186/gb-2008-9-1-r7.
- 604 63. Bairoch A and Apweiler R. The SWISS-PROT protein sequence database and its supplement  
605 TrEMBL in 2000. *Nucleic Acids Res*. 2000;28 1:45-8. doi:10.1093/nar/28.1.45.
- 606 64. Mistry J, Chuguransky S, Williams L, Qureshi M, Salazar Gustavo A, Sonnhammer ELL, et al.  
607 Pfam: The protein families database in 2021. *Nucleic Acids Research*. 2020;49 D1:D412-D9.  
608 doi:10.1093/nar/gkaa913.
- 609 65. Camacho C, Coulouris G, Avagyan V, Ma N, Papadopoulos J, Bealer K, et al. BLAST+:  
610 architecture and applications. *BMC Bioinformatics*. 2009;10:421. doi:10.1186/1471-2105-10-  
611 421.

- 612 66. Jones P, Binns D, Chang HY, Fraser M, Li W, McAnulla C, et al. InterProScan 5: genome-scale  
613 protein function classification. *Bioinformatics*. 2014;30 9:1236-40.  
614 doi:10.1093/bioinformatics/btu031.
- 615 67. Kudtarkar P and Cameron RA. Echinobase: an expanding resource for echinoderm genomic  
616 information. *Database (Oxford)*. 2017;2017 doi:10.1093/database/bax074.  
617 <http://www.echinobase.org>
- 618 68. Emms DM and Kelly S. OrthoFinder: phylogenetic orthology inference for comparative  
619 genomics. *Genome Biology*. 2019;20 1:238. doi:10.1186/s13059-019-1832-y.
- 620 69. Wu T, Hu E, Xu S, Chen M, Guo P, Dai Z, et al. clusterProfiler 4.0: A universal enrichment tool  
621 for interpreting omics data. *Innovation (N Y)*. 2021;2 3:100141.  
622 doi:10.1016/j.xinn.2021.100141.
- 623 70. Penn O, Privman E, Ashkenazy H, Landan G, Graur D and Pupko T. GUIDANCE: a web server  
624 for assessing alignment confidence scores. *Nucleic Acids Res*. 2010;38 Web Server  
625 issue:W23-8. doi:10.1093/nar/gkq443.
- 626 71. Sela I, Ashkenazy H, Katoh K and Pupko T. GUIDANCE2: accurate detection of unreliable  
627 alignment regions accounting for the uncertainty of multiple parameters. *Nucleic Acids Res*.  
628 2015;43 W1:W7-14. doi:10.1093/nar/gkv318.
- 629 72. Landan G and Graur D. Local reliability measures from sets of co-optimal multiple sequence  
630 alignments. *Pac Symp Biocomput*. 2008:15-24.
- 631 73. Suyama M, Torrents D and Bork P. PAL2NAL: robust conversion of protein sequence  
632 alignments into the corresponding codon alignments. *Nucleic Acids Res*. 2006;34 Web  
633 Server issue:W609-12. doi:10.1093/nar/gkl315.
- 634 74. Yang Z. PAML 4: phylogenetic analysis by maximum likelihood. *Mol Biol Evol*. 2007;24  
635 8:1586-91. doi:10.1093/molbev/msm088.
- 636 75. Emms D.M. and Kelly S. STAG: Species Tree Inference from All Genes. *bioRxiv*. 2018. doi:  
637 <https://doi.org/10.1101/267914>
- 638 76. Lee Y; Kim B; Jung J; Koh B; Jhang SY; Ban C; Chi W; Kim S; Yu J (2022): Supporting data for  
639 "Chromosome-level genome assembly of *Plazaster borealis*: shed light on the  
640 morphogenesis of multi-armed starfish and its regenerative capacity" *GigaScience Database*.  
641 <http://dx.doi.org/10.5524/102219>
- 642 77. National Institute of Biological Resources. <https://www.nibr.go.kr>

643

644

645

646 **Figures**

647 **Figure 1:** A. Adult *Plazaster borealis*. Photograph by National Institute of Biological  
648 Resources [77] B. Sampling spot of *P. borealis* studied in this research.

649 **Figure 2:** A phylogenetic tree of *P. borealis* and six other species. This tree was constructed  
650 using protein sequences of seven species, showing gene family expansion and contraction. The  
651 number below the branches represents the number of gene families with either expansion (blue)  
652 and contraction (red). The ratio of expanded and contracted gene families was expressed in the  
653 pie chart above the branches. The numbers at the node indicate the bootstrap value. The species  
654 used in the tree are *P. borealis*, *Asterias rubens*, *Acanthaster planci*, *Patiria miniata*, *Lytechinus*  
655 *variegatus*, *Parastichopus parvimensis*, and *Strongylocentrotus purpuratus*.

656 **Figure 3:** Syntenic relationship of *P. borealis* and species of the order Forcipulatida. A.  
657 Synteny between *Asterias rubens* and *P. borealis*. The syntenic blocks were calculated with  
658 MCscan. B-D. Syntenic relationship of *P. borealis* between *A. rubens* (B), *Pisaster ochraceus*  
659 (C), *Marthasterias glacialis* (D) Genomic sequences were compared with Chromeister based  
660 on inexact k-mer matching.

661 **Figure 4:** GO enrichment analysis of expanded gene families of *P. borealis*.

662 **Figure 5:** Results of GO enrichment analysis of positively selected genes. BP: GO Term  
663 Biological Process (green), CC: GO Term Cellular Component (red), KEGG: Kyoto  
664 Encyclopedia of Genes and Genomes (blue).

665

666

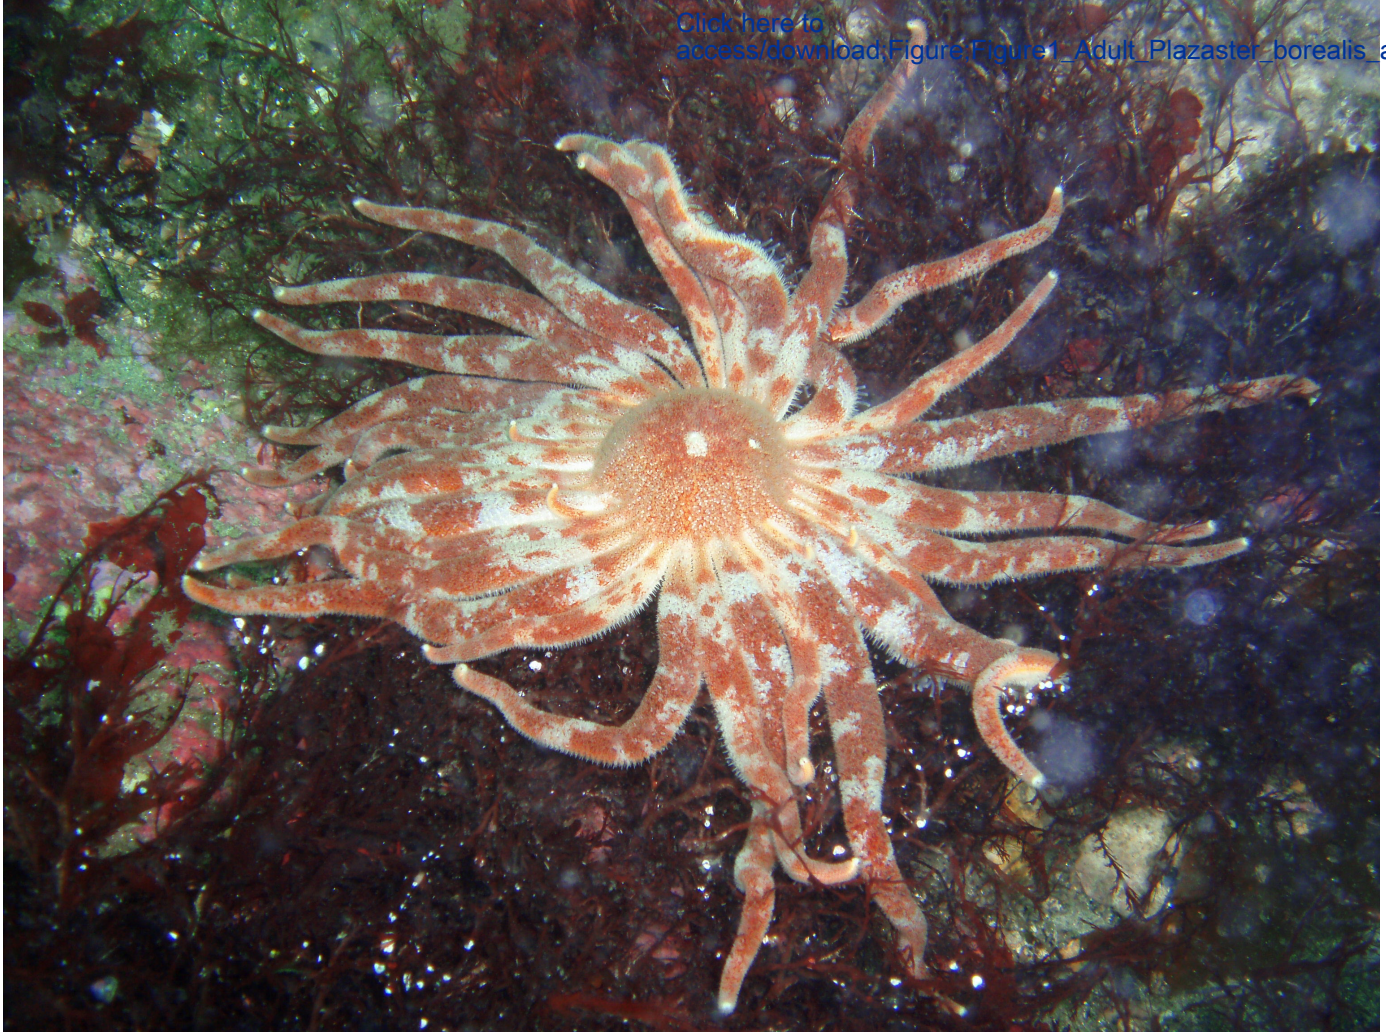

B.

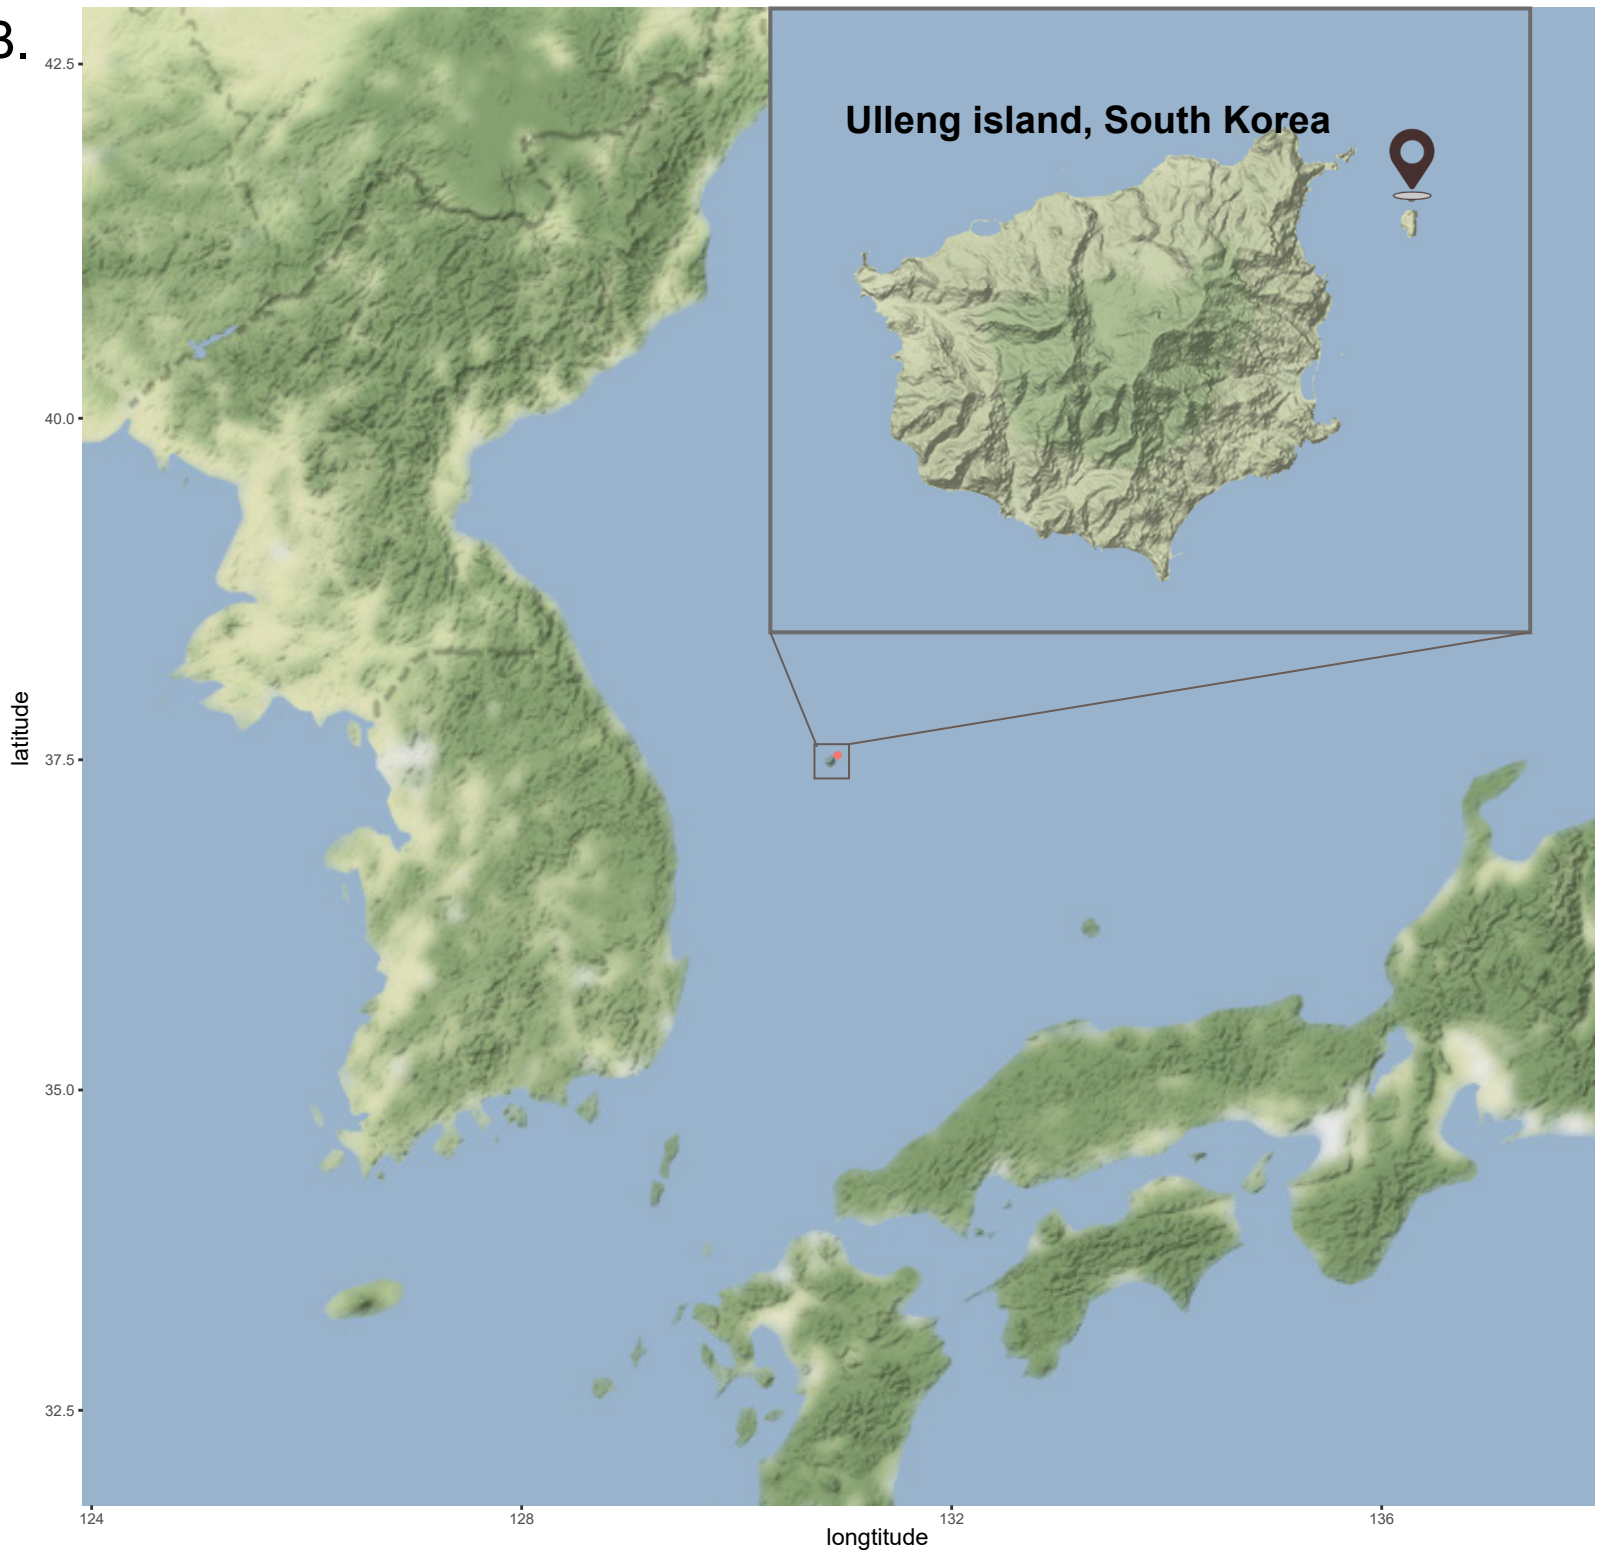

Expansion  
Contraction

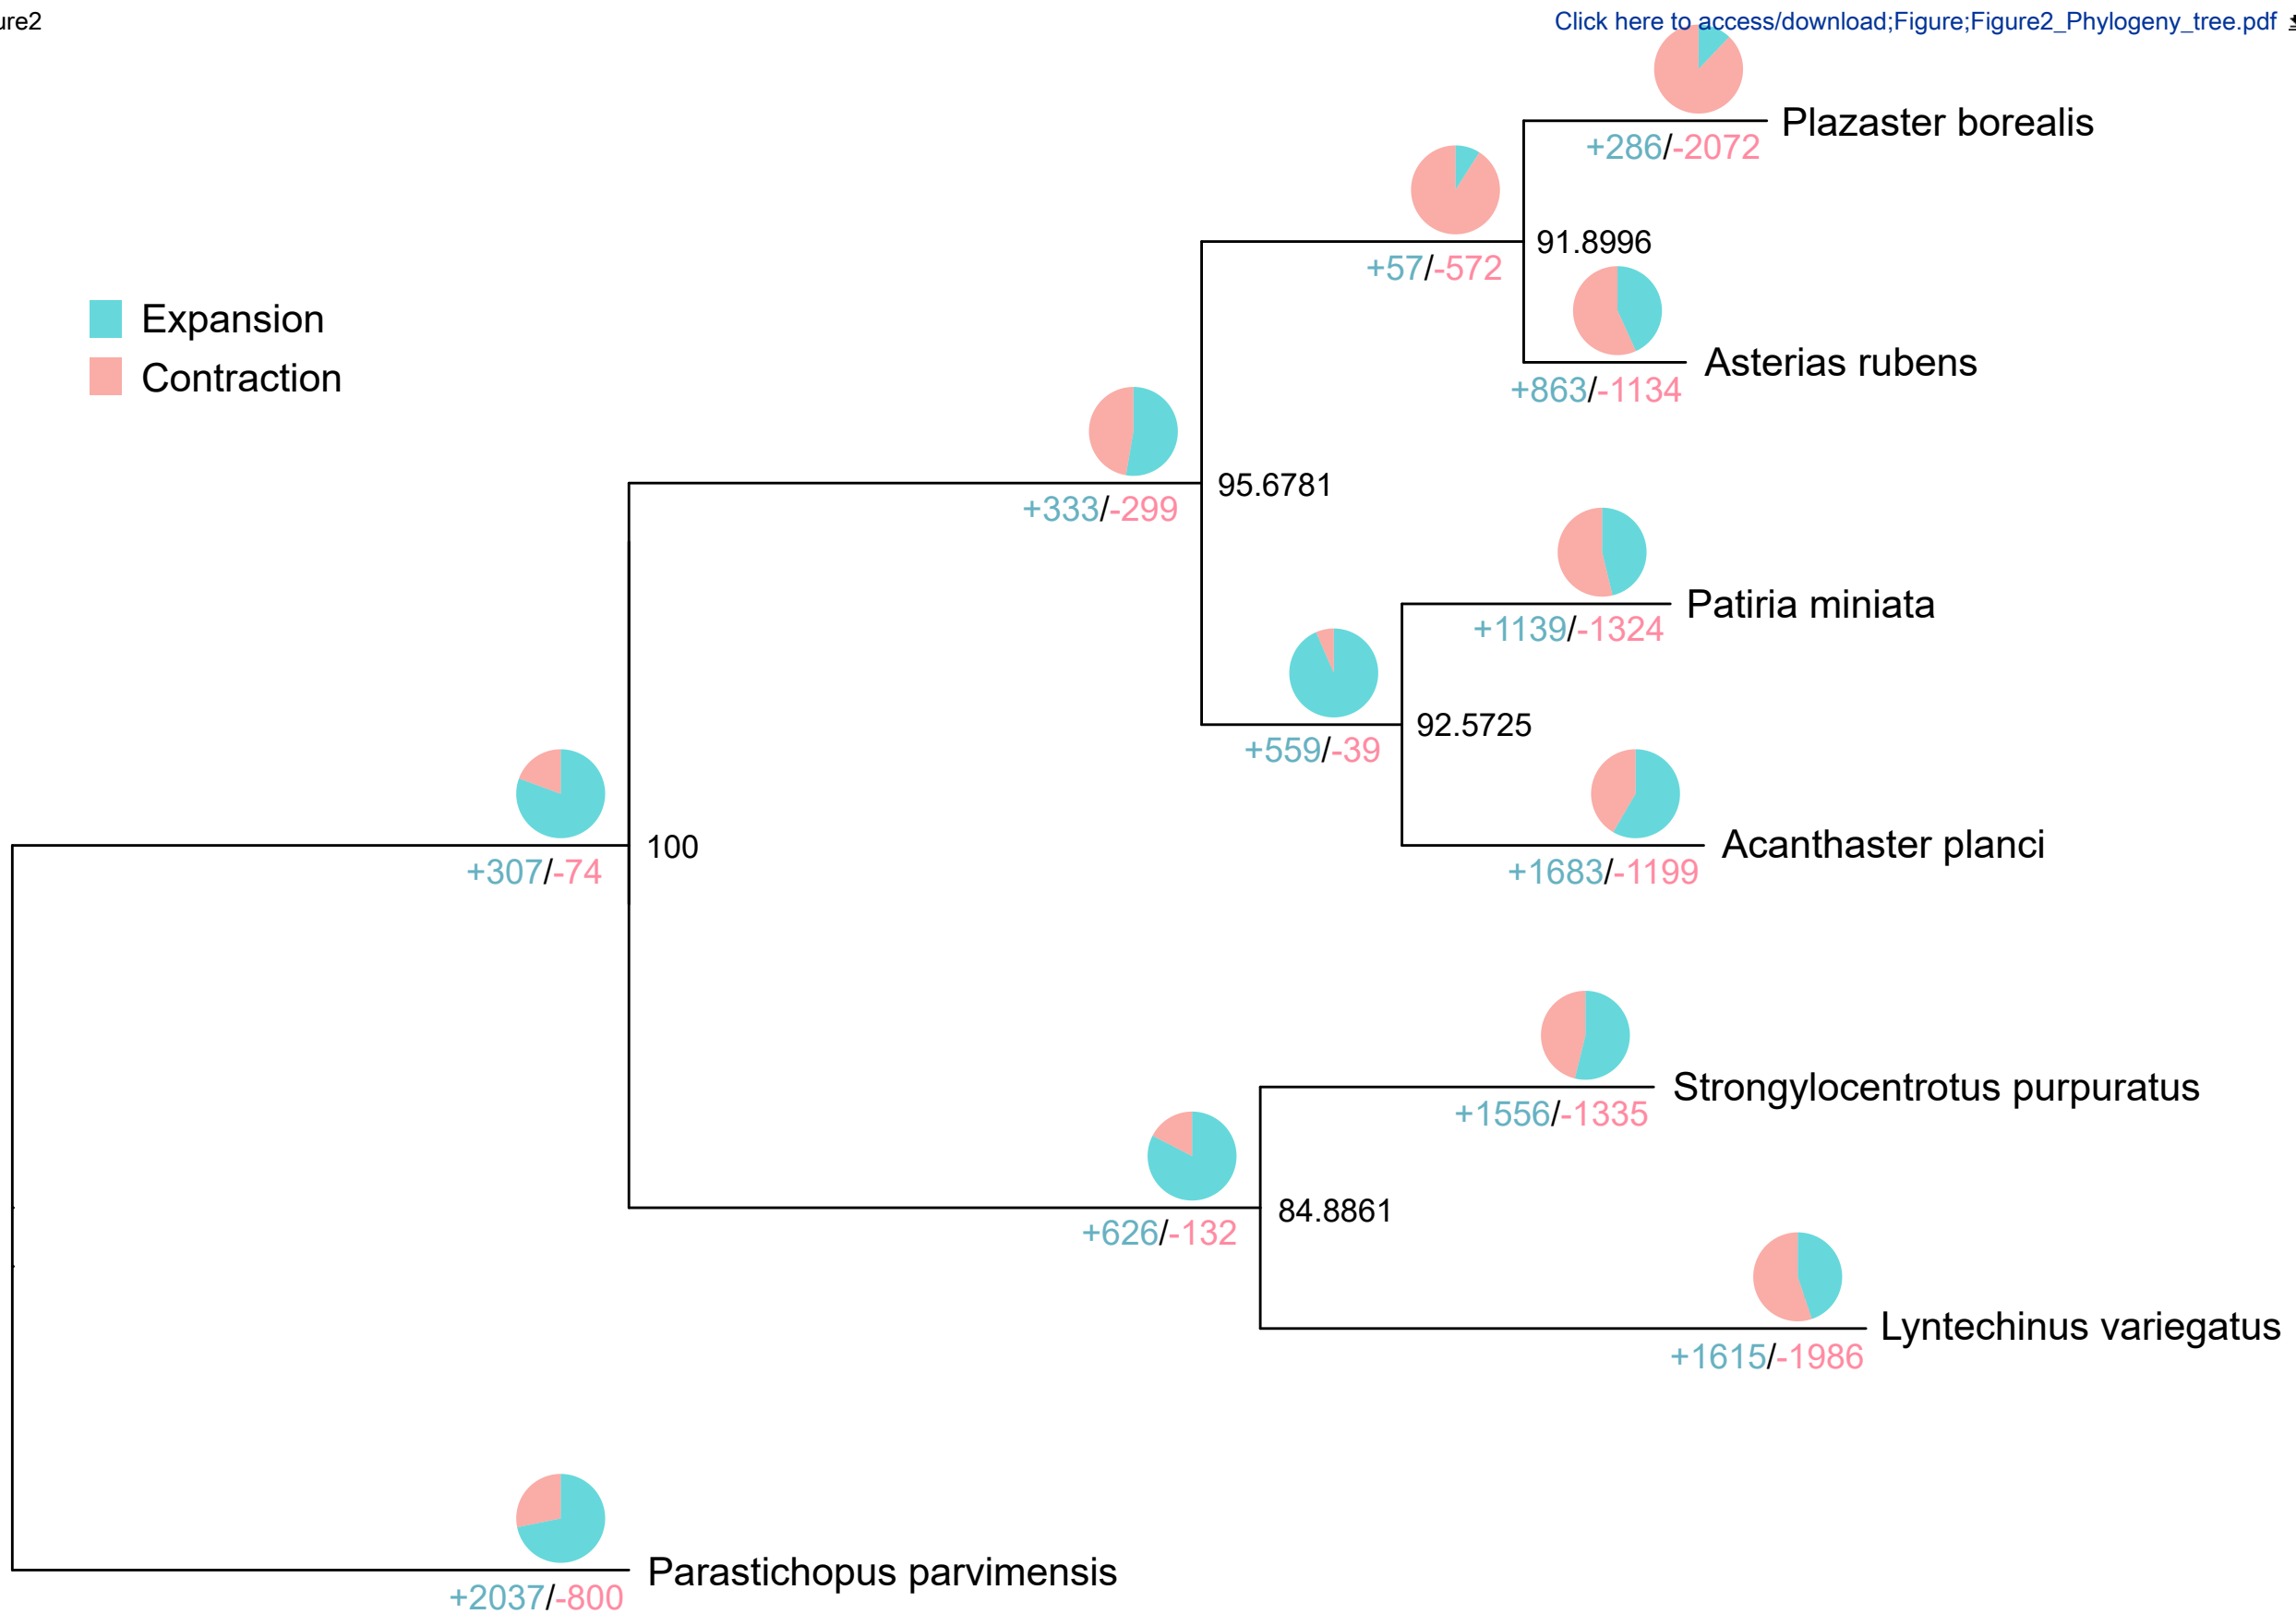



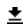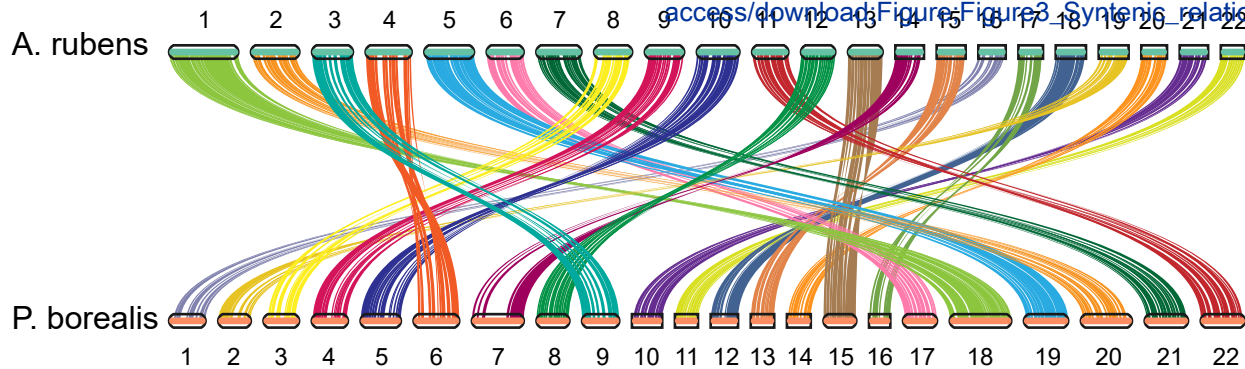

B

*Plazaster borealis* vs *Asterias rubens* score = 0.49

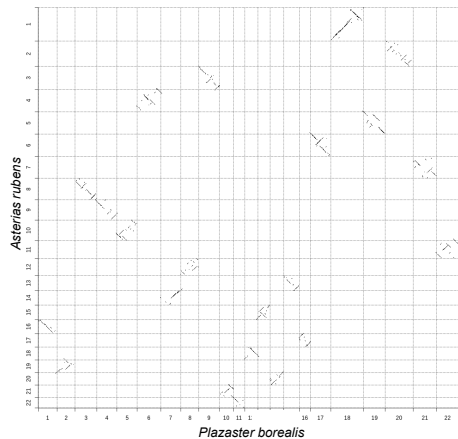

C

*Plazaster borealis* vs *Pisaster ochraceus* score = 0.301

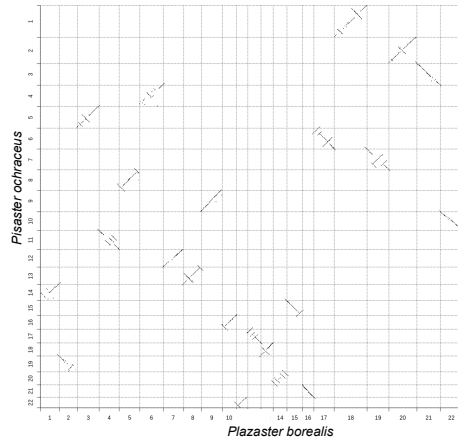

D

*Plazaster borealis* vs *Marthasterias glacialis* score = 0.708

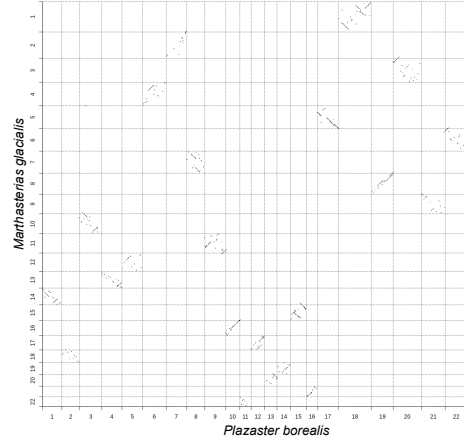

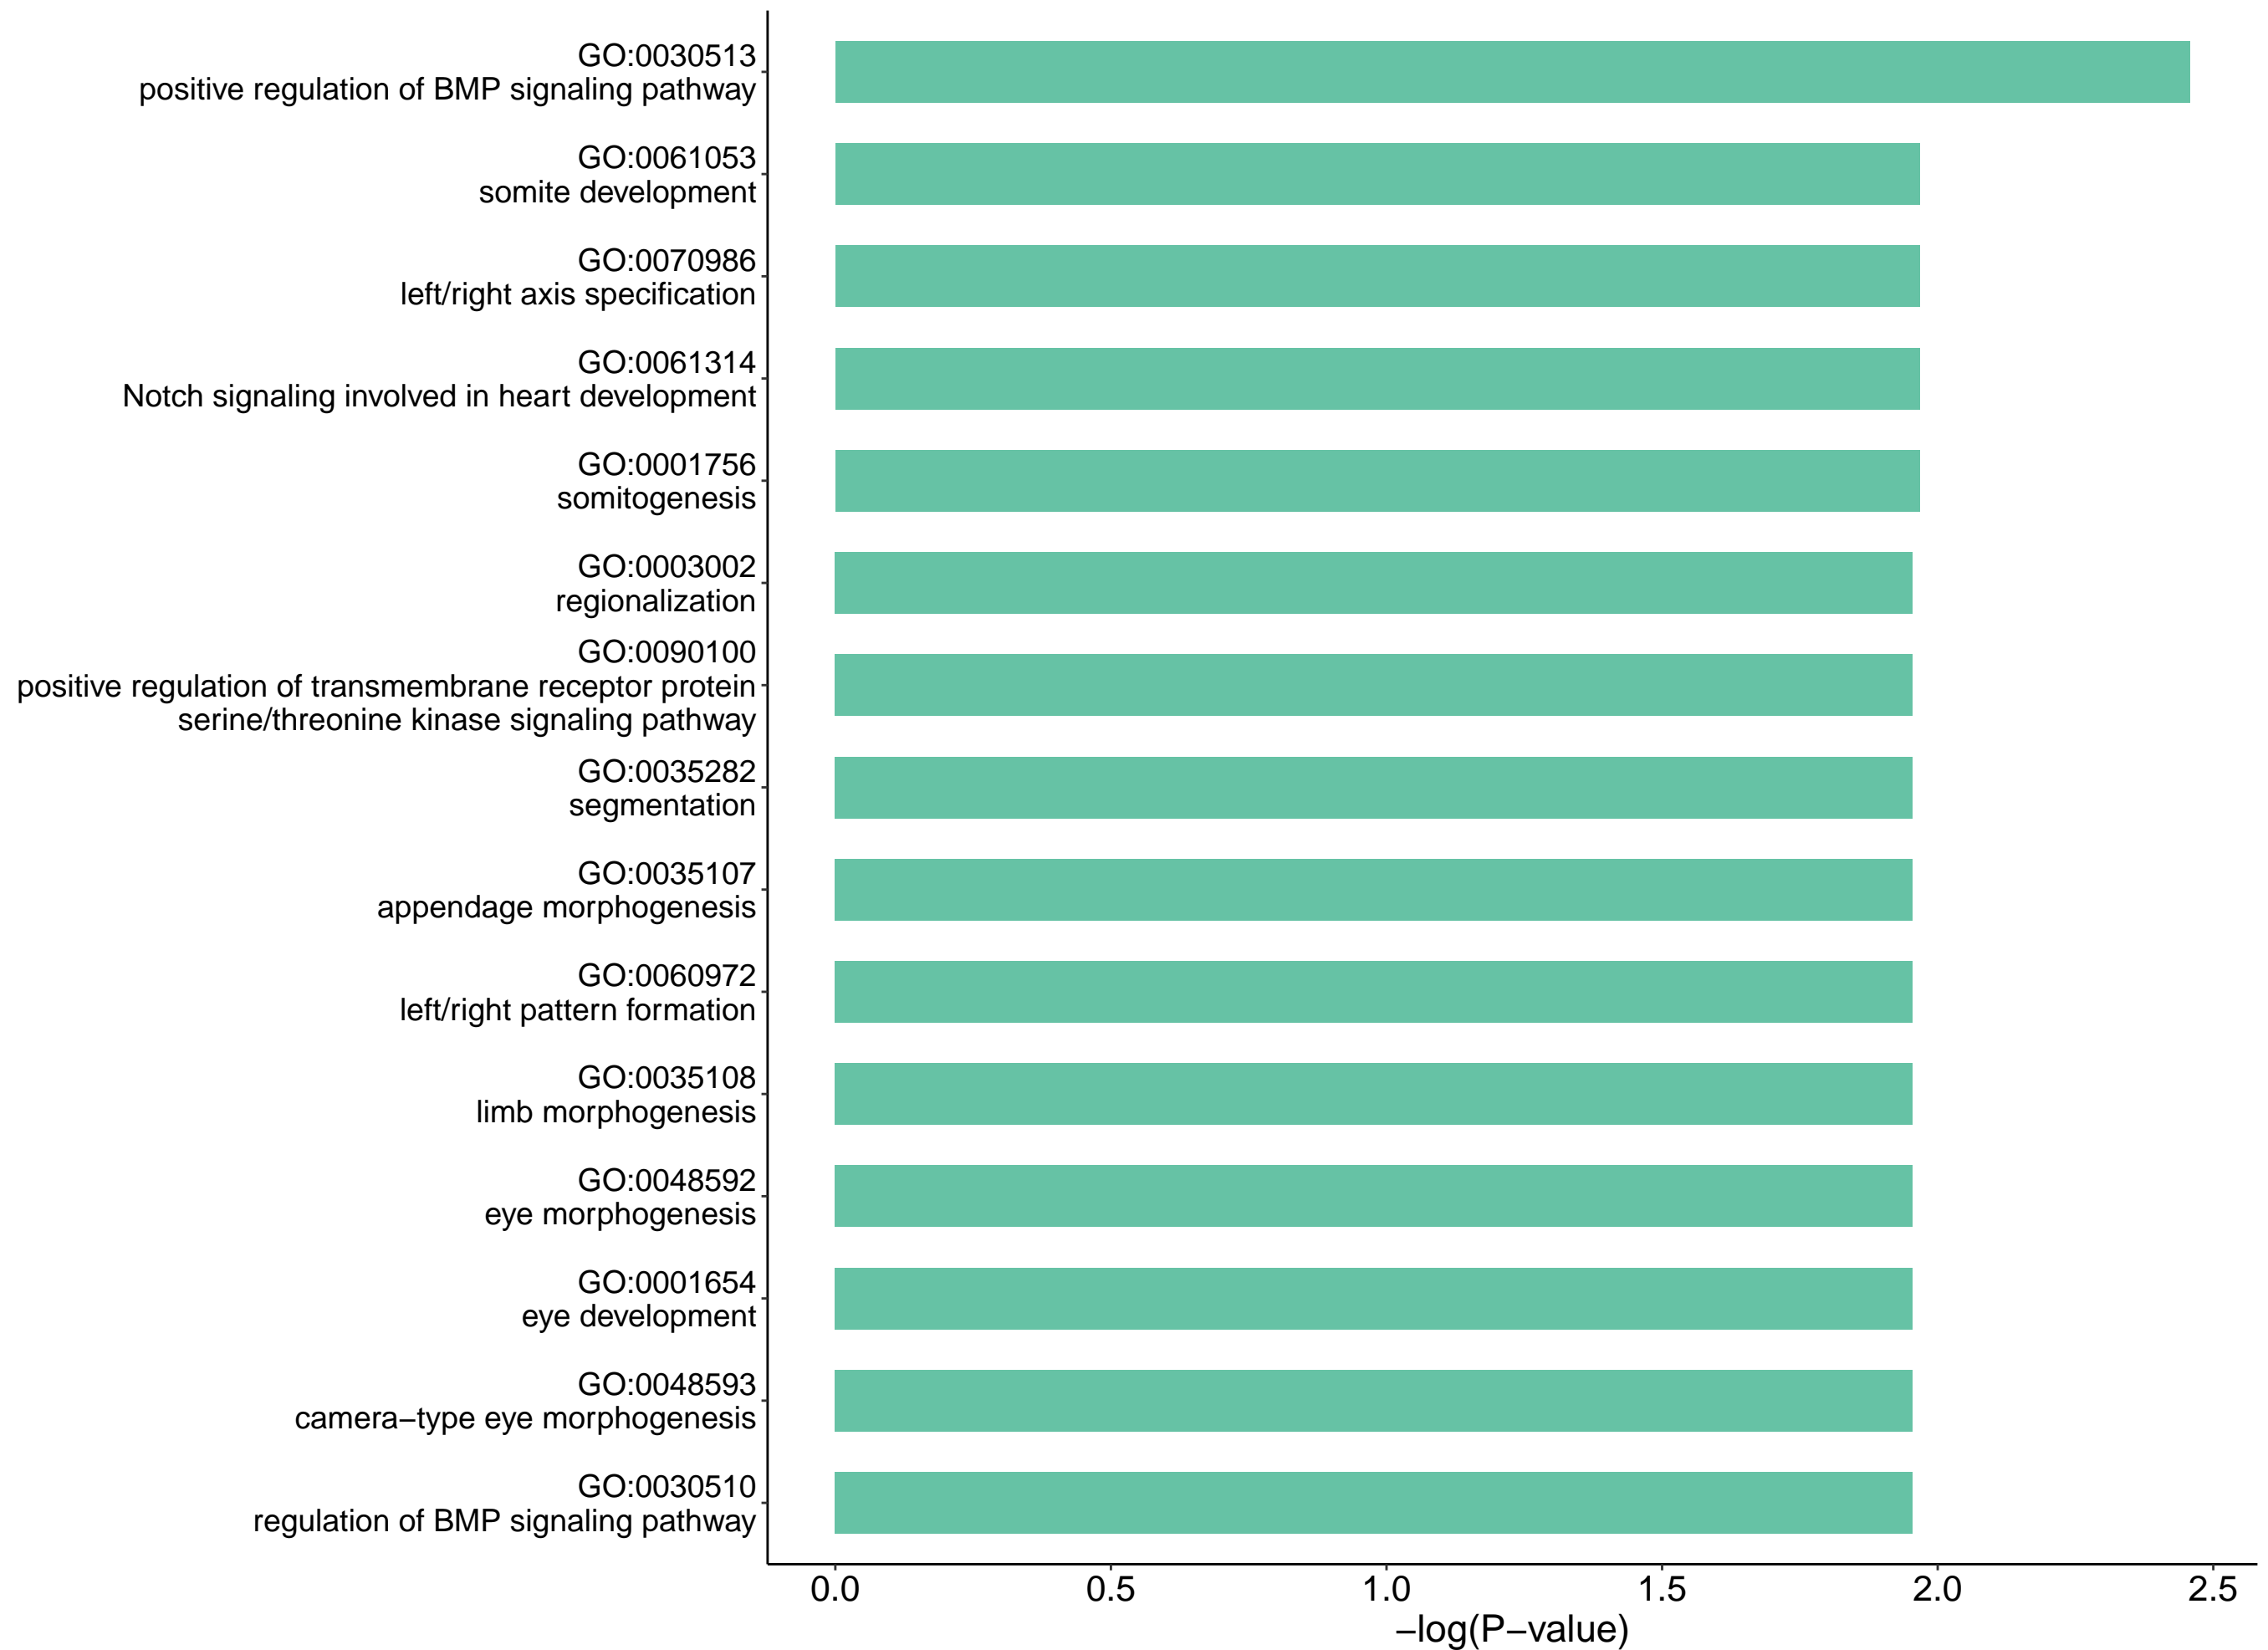

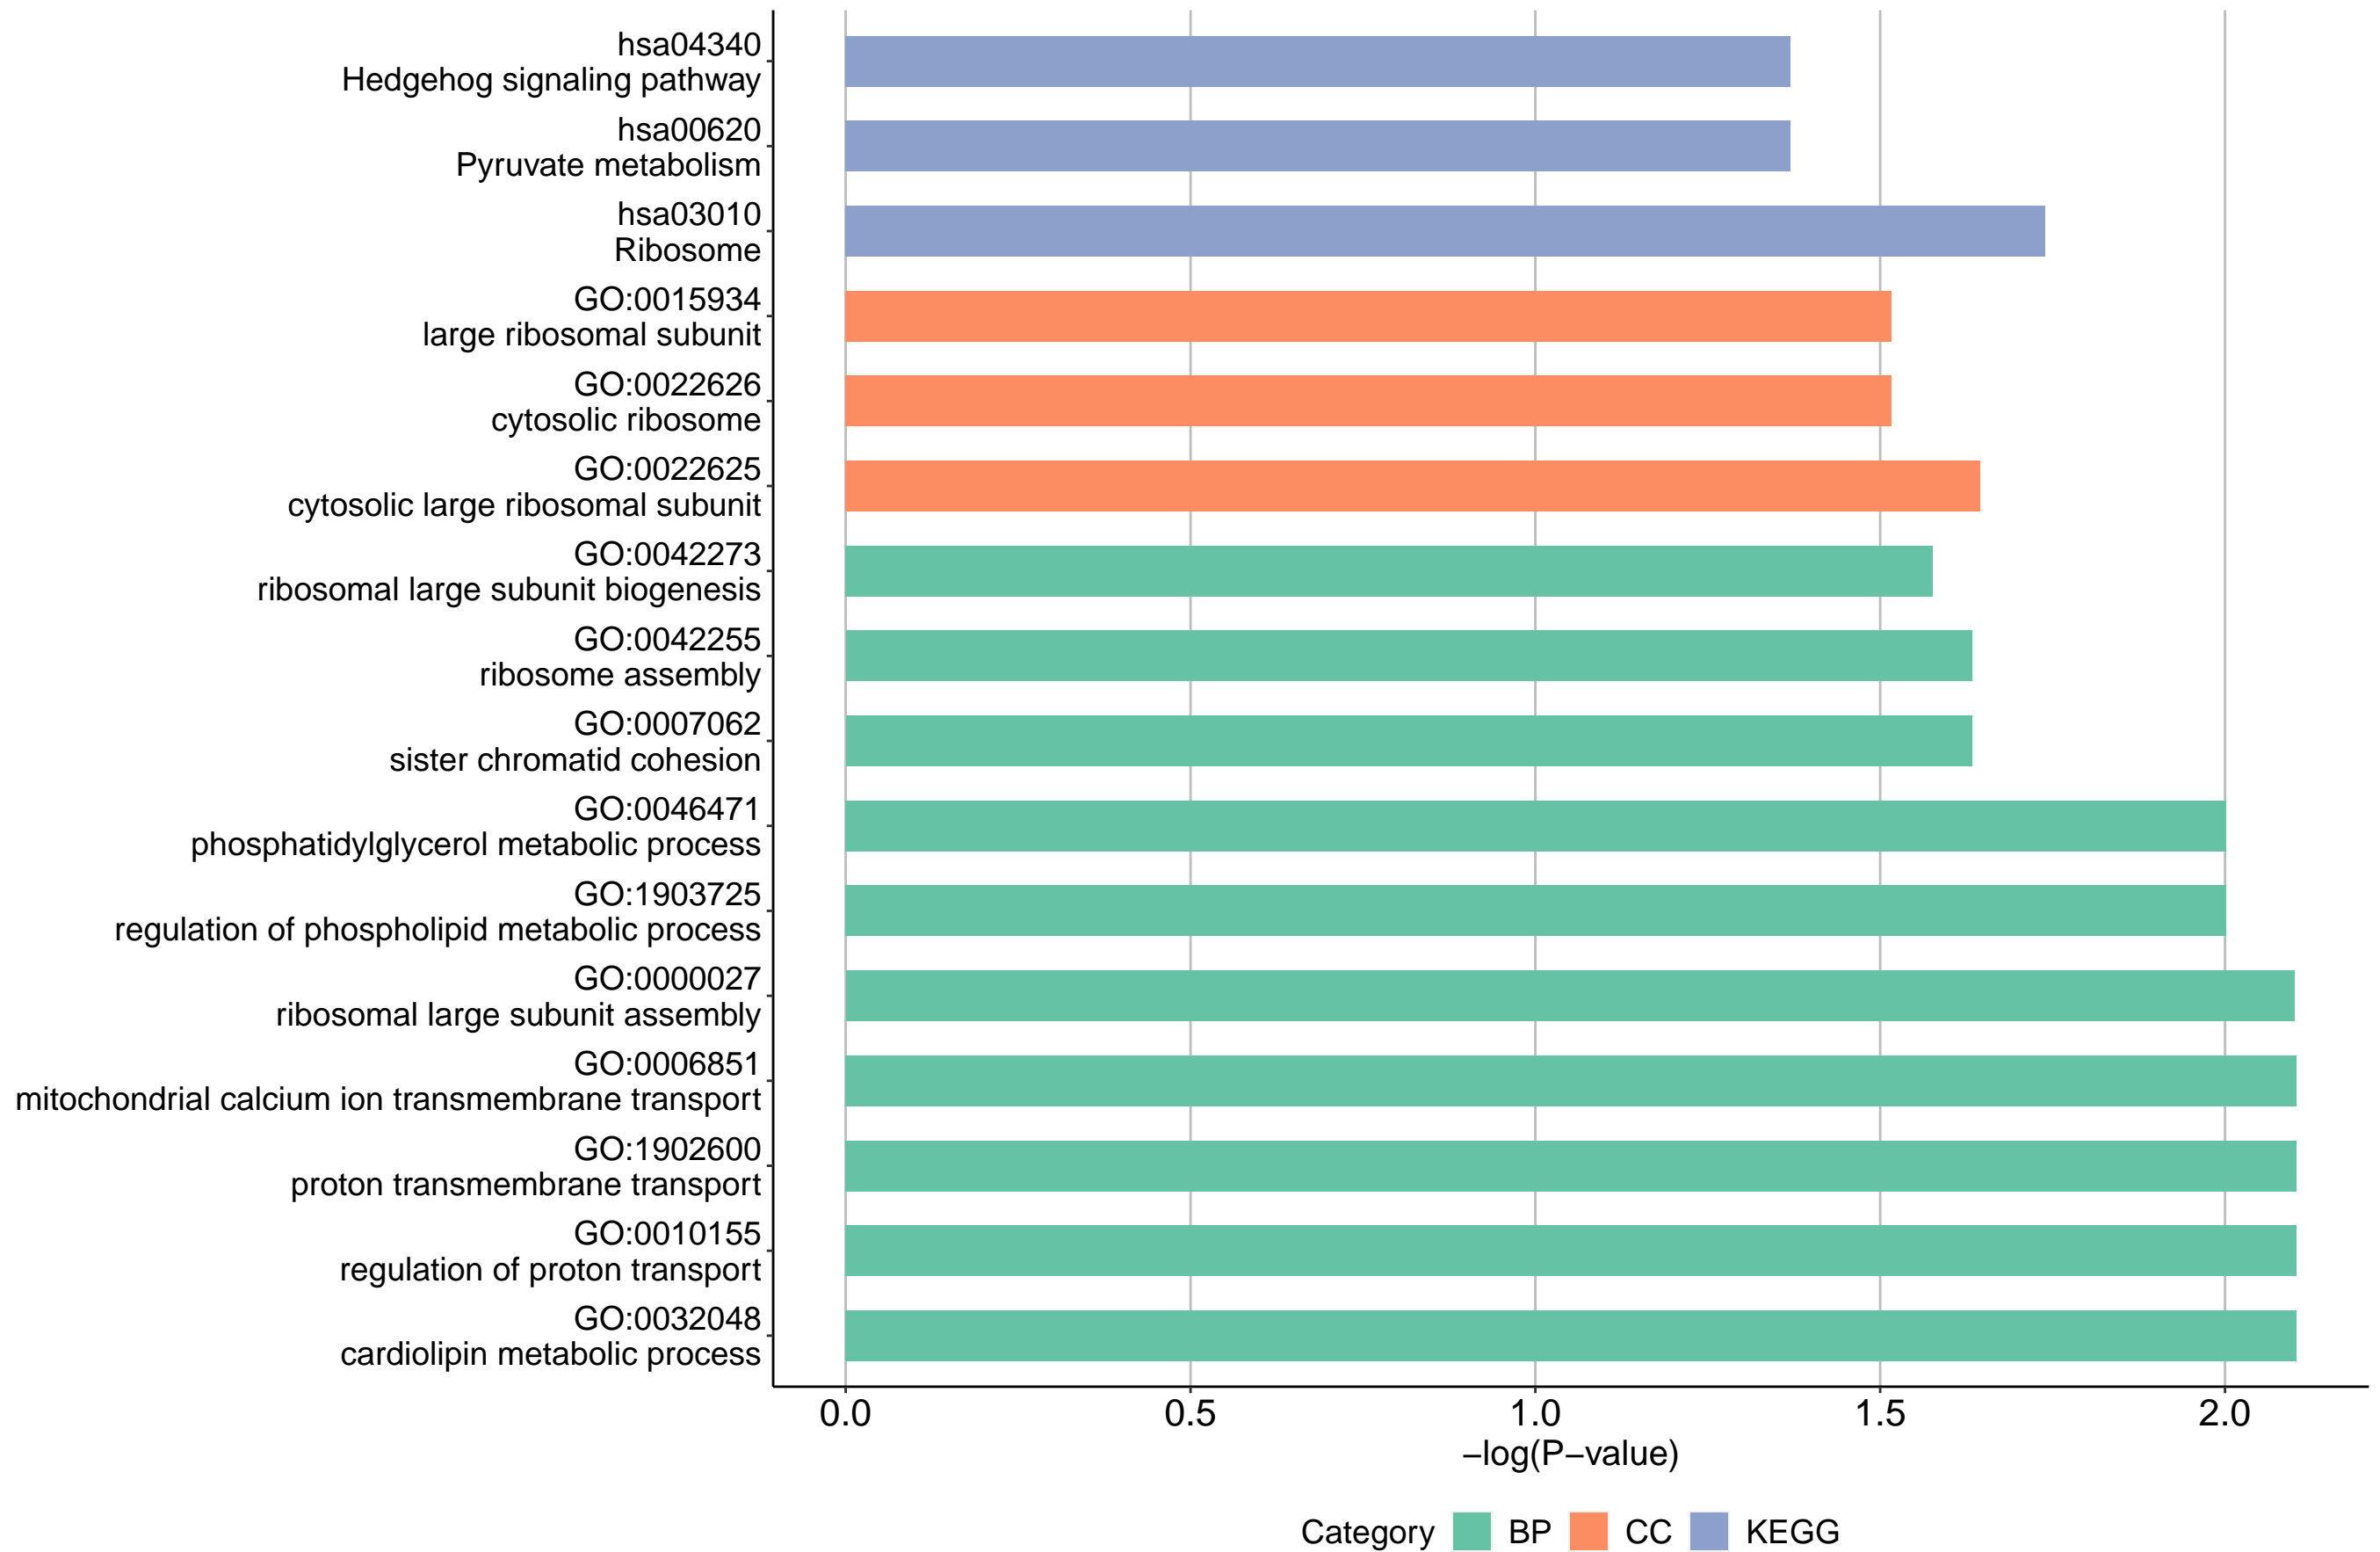

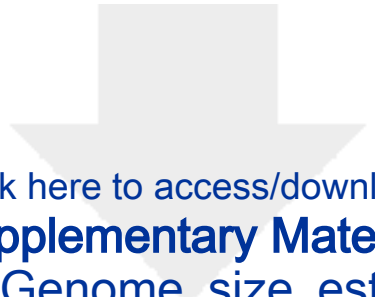

Click here to access/download

**Supplementary Material**

Supp\_Fig1\_Genome\_size\_estimation.png

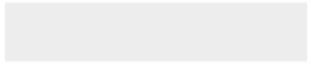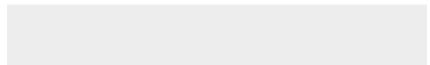



Click here to access/download

**Supplementary Material**

Supp\_Fig2\_Plazaster\_borealis\_genome\_assembly\_com  
pleteness.pdf

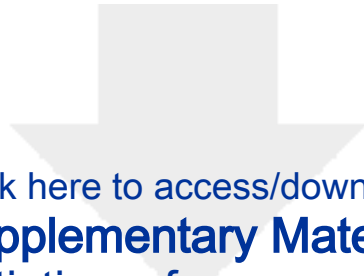

Click here to access/download

**Supplementary Material**

Supp\_Table1\_Statistics\_of\_raw\_sequencing\_data.xlsx

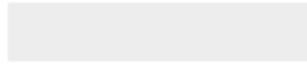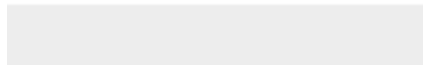



Click here to access/download

**Supplementary Material**

Supp\_Table2\_Statistics\_of\_assembly\_before\_scaffolding  
.xlsx

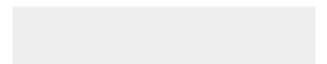



Click here to access/download

**Supplementary Material**

Supp\_Table3\_GO\_KEGG\_enrichment\_of\_con&exp\_of\_7  
\_echinoderms.xlsx





Click here to access/download

**Supplementary Material**

Supp\_Table4\_GO\_KEGG\_enrichment\_of\_Pborealis\_spe  
cific\_ortho.xlsx



Click here to access/download

**Supplementary Material**

Supp\_Table5\_GO\_KEGG\_enrichment\_of\_positively\_selected\_genes.xlsx
