# Supplementary material for: Chromosome-level genome assembly of Plazaster borealis sheds light on the morphogenesis of multiarmed starfish and its regenerative capacity
Source: PubMed Central journal article supplement (PMC9270726; doi:10.1093/gigascience/giac063), 2022-07-09
Supplement: giac063_response_to_reviewer_comments_revision_1.pdf [file giac063_response_to_reviewer_comments_revision_1.pdf]

## Author's Response To Reviewer Comments

Close

Reviewer #2:

1. Suggestions and editions of the language.

We revised all the suggested sentences in the manuscript.

Close
